# Supplementary material for: Model study on trapping of protein selenenic acids by utilizing a stable synthetic congener
Source: Royal Society of Chemistry journal article supplement (doi:10.1039/c9nj01072f), 2019-01-01
Supplement: c9nj01072f1.pdf [file c9nj01072f1.pdf]

Supporting Information for:

**“Model Study on Trapping of Protein Selenenic Acids  
by Utilizing a Stable Synthetic Congener”**

Shohei Sase, Ryutaro Kimura, Ryosuke Masuda, and Kei Goto\*

*Department of Chemistry, School of Science, Tokyo Institute of Technology, 2-12-1 Ookayama, Meguro-ku,  
Tokyo 152-8551, Japan*

**Contents**

|                                |           |
|--------------------------------|-----------|
| <b>1. Experimental section</b> | <b>2</b>  |
| <b>2. NMR data</b>             | <b>11</b> |
| <b>3. References</b>           | <b>23</b> |

## 1. Experimental Section

**General experimental methods:** Unless otherwise stated, all operations were performed by using high-vacuum and standard Schlenk techniques under an argon atmosphere. THF (anhydrous) was purchased from Kanto Chemical and passed through a Kayama Oxygen solvent purification system prior to use. Other solvents were purchased from commercial sources and used as received. **S1**<sup>1</sup>, **S2**,<sup>2</sup> **5**<sup>3</sup>, and cyclooctyne (**14**)<sup>4</sup> were prepared according to the literature procedure. Other chemicals were purchased from commercial sources and used as received. Silica gel column chromatography was performed using Kanto silica gel N60 or Merck silica gel 60. Preparative thin layer chromatography (PTLC) was performed using Merck silica gel 60 PF<sub>254</sub>. <sup>1</sup>H NMR spectra were recorded on a JEOL ECS-400, a JEOL ECX-500, or a JEOL ECZ-500, and the chemical shifts of <sup>1</sup>H are referenced to the residual proton signal of CDCl<sub>3</sub> (δ 7.25) or C<sub>6</sub>D<sub>6</sub> (δ 7.15). <sup>13</sup>C NMR spectra were recorded on JEOL ECS-400, a JEOL ECX-500, or a JEOL ECZ-500, and the chemical shifts of <sup>13</sup>C are referenced to the signal of CDCl<sub>3</sub> (δ 77.0) or C<sub>6</sub>D<sub>6</sub> (δ 128.0). <sup>77</sup>Se NMR spectra were recorded on a JEOL ECX-500, and the chemical shifts of <sup>77</sup>Se are referenced to the diphenyl diselenide (δ 480) as external standard. All spectra were assigned with the aid of DEPT, COSY, HMQC, and HMBC NMR experiments. IR spectra were recorded on a JASCO FT/IR-4100 by utilizing a KBr disk. Mass spectra were measured on a JEOL JMS-T100GCv “AccuTOF GCv” using a field desorption probe. Melting points were measured with a Yanaco MP-S3 and are uncorrected.

### Synthesis of quinquephenyl bromide **S3**.

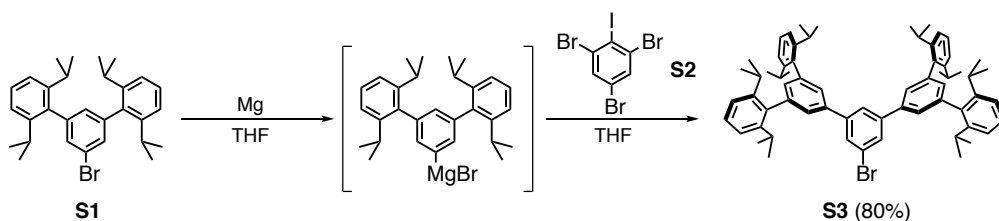

To a Grignard reagent prepared by the reaction of 2-bromo-1,3-diisopropylbenzene (**S1**) (12.97 g, 27.2 mmol) and magnesium turnings (0.9476 g, 39.0 mmol) in THF (50 mL) was added a solution of 1,3,5-tribromo-2-iodobenzene (**S2**) (4.179 g, 9.48 mmol) over 30 min at 75 °C. The reaction mixture was stirred at 75 °C overnight and then treated with 1 M HCl at 0 °C. After extraction with ether, the combined organic layer was dried over MgSO<sub>4</sub> and evaporated in vacuo. To the resulting oily mixture was added EtOH to precipitate white solids, which was collected by filtration. It was purified by silica gel column chromatography (hexane:CHCl<sub>3</sub> = 7:1) to give quinquephenyl bromide **S3** (6.923 g, 7.29 mmol, 80%) as colorless crystals.

**S3**: colorless crystals; M.p. >300 °C; <sup>1</sup>H NMR (400 MHz, CDCl<sub>3</sub>) δ 1.04 (d, *J* = 6.8 Hz, 24H), 1.14 (d, *J* = 6.8 Hz, 24H), 2.73 (sept, *J* = 6.8 Hz, 8H), 7.03 (t, *J* = 1.5 Hz, 2H), 7.19 (d, *J* = 7.7 Hz, 8H), 7.32 (t, *J* = 7.7 Hz, 4H), 7.39 (d, *J* = 1.5 Hz, 4H), 7.69 (d, *J* = 1.5 Hz, 2H), 7.73 (t, *J* = 1.5 Hz, 1H); <sup>13</sup>C NMR (100 MHz,

CDCl<sub>3</sub>)  $\delta$  24.2 (q), 24.3 (q), 30.4 (d), 122.6 (d), 123.3 (s), 125.2 (d), 126.5 (d), 128.1 (d), 129.5 (d), 130.6 (d), 138.8 (s), 139.5 (s), 141.3 (s), 143.7 (s), 146.7 (s). Anal. Calcd. for C<sub>66</sub>H<sub>77</sub>Br: C, 83.42; H, 8.17. Found: C, 83.69; H, 8.47.

#### Synthesis of arylboronic acid pinacol ester **4**.

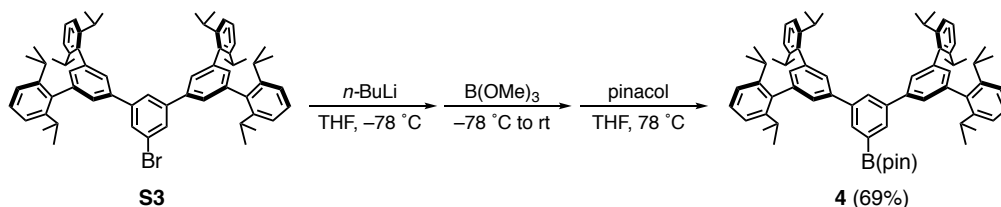

To a solution of **3** (6.923 g, 7.29 mmol) in THF (30 mL) was added *n*-BuLi (1.5 M in hexane, 5.2 mL, 7.8 mmol) at  $-78\text{ }^\circ\text{C}$  over 30 min. After the reaction mixture was stirred for 30 min at  $-78\text{ }^\circ\text{C}$ , trimethyl borate (0.86 mL, 7.7 mmol) was added at  $-78\text{ }^\circ\text{C}$ , and it was allowed to warm to room temperature and stirred overnight. The reaction mixture was treated with 1 M HCl and extracted with Et<sub>2</sub>O. The combined organic layer was dried over MgSO<sub>4</sub>, and the solvent was evaporated in vacuo. To the resulting residue was added THF (15 mL) and pinacol (0.860 g, 7.28 mmol), and it was stirred at  $78\text{ }^\circ\text{C}$  overnight. After evaporation of the solvent, the crude mixture was purified by silica gel column chromatography (hexane:CHCl<sub>3</sub> = 7:1) to give **4** (4.072 g, 4.09 mmol, 69%) as colorless crystals.

**4**: colorless crystals; M.p.  $>300\text{ }^\circ\text{C}$ ; <sup>1</sup>H NMR (400 MHz, CDCl<sub>3</sub>)  $\delta$  1.06 (d, *J* = 6.9 Hz, 24H), 1.16 (d, *J* = 6.9 Hz, 24H), 1.32 (s, 12H), 2.79 (sept, *J* = 6.9 Hz, 8H), 7.02 (d, *J* = 1.2 Hz, 2H), 7.22 (d, *J* = 7.6 Hz, 8H), 7.35 (t, *J* = 7.6 Hz, 4H), 7.48 (d, *J* = 1.6 Hz, 4H), 7.94 (d, *J* = 1.6 Hz, 1H), 8.04 (d, *J* = 1.6 Hz, 2H); <sup>13</sup>C NMR (100 MHz, CDCl<sub>3</sub>)  $\delta$  24.1 (q), 24.4 (q), 24.9 (q), 30.4 (d), 84.0 (s), 122.5 (d), 126.6 (d), 127.9 (d), 129.2 (d), 129.8 (d), 132.8 (d), 139.1 (s), 140.77 (s), 140.83 (s), 121.1 (s), 146.7 (s). Anal. Calcd. for C<sub>56</sub>H<sub>57</sub>BO<sub>2</sub>: C, 87.03; H, 7.43. Found: C, 87.13; H, 7.72.

#### Synthesis of BpsCHO **5**.

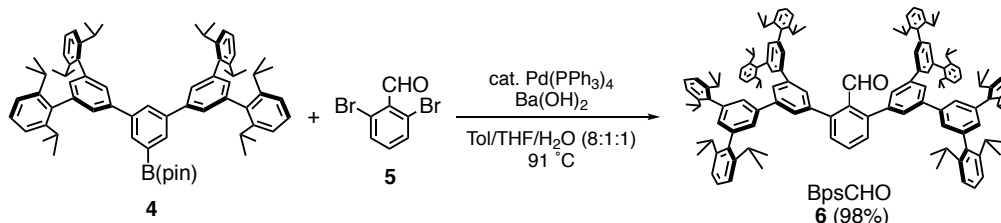

Toluene and H<sub>2</sub>O were degassed through bubbling of argon for 1 h prior to use. A mixture of **4** (1.798 g, 1.804 mmol), **5** (0.267 g, 1.01 mmol), Pd(PPh<sub>3</sub>)<sub>4</sub> (0.225 g, 0.195 mmol), and Ba(OH)<sub>2</sub>·8H<sub>2</sub>O (2.842 g, 9.01 mmol) in a mixed solvent of THF (36 mL), THF (4.5 mL), and H<sub>2</sub>O (4.5 mL) was stirred at  $91\text{ }^\circ\text{C}$  for 21 h. After cooling to room temperature, the reaction mixture was passed through a pad of celite, and the solvent was evaporated in vacuo. The crude mixture was purified by silica gel column chromatography

(hexane:CHCl<sub>3</sub> = 4:1) to give BpsCHO **6** (1.633 g, 0886 mmol, 98%) as colorless crystals.

**6**: colorless crystals; M.p. 275.2-277.5 °C; <sup>1</sup>H NMR (400 MHz, CDCl<sub>3</sub>) δ 1.03 (d, *J* = 6.8 Hz, 48H), 1.10 (d, *J* = 6.8 Hz, 48H), 2.74 (sept, *J* = 6.8 Hz, 16H), 6.99 (t, *J* = 1.6 Hz, 4H), 7.17 (d, *J* = 7.8 Hz, 16H), 7.31 (t, *J* = 7.8 Hz, 8H), 7.44 (d, *J* = 1.6 Hz, 8H), 7.47 (d, *J* = 8.4 Hz, 2H), 7.53 (d, *J* = 1.6 Hz, 4H), 7.59 (t, *J* = 8.4 Hz, 1H), 7.86 (t, *J* = 1.6 Hz, 2H), 10.13 (s, 1H); <sup>13</sup>C NMR (125 MHz, CDCl<sub>3</sub>) δ 24.1 (q), 24.3 (q), 30.4 (d), 122.5 (d), 125.5 (d), 126.4 (d), 127.5 (d), 127.9 (d), 130.3 (d), 130.8 (d), 131.8 (d), 133.0 (s), 139.0 (s), 140.1 (s), 140.8 (s), 141.1 (s), 141.5 (s), 144.1 (s), 146.7 (s), 193.6 (d); LRMS (FD) *m/z* 1843 [M<sup>+</sup>]. Anal. Calcd for C<sub>139</sub>H<sub>158</sub>O: C, 90.50; H, 8.63. Found: C, 90.48, H, 8.34.

### Synthesis of BpsCH<sub>2</sub>OH **7**.

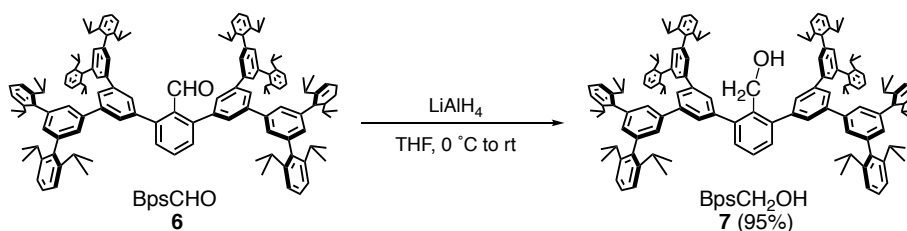

To a mixture of LiAlH<sub>4</sub> (101.2 mg, 2.67 mmol) in THF (12 mL) was added a solution of **6** (0.572 g, 0.310 mmol) in THF (8 mL) at 0 °C over 15 min. The reaction mixture was allowed to warm to room temperature and stirred for 3 h, and then 1 M aq. HCl was carefully added at 0 °C. After extraction with CHCl<sub>3</sub>, the combined organic layer was dried over MgSO<sub>4</sub>, and the solvent was evaporated in vacuo. The crude mixture was recrystallized from hexane/acetonitrile to give **7** (0.544 g, 0.295 mmol, 95%) as colorless crystals.

**7**: colorless crystals; M.p. >300 °C; <sup>1</sup>H NMR (400 MHz, CDCl<sub>3</sub>) δ 1.03 (d, *J* = 6.8 Hz, 48H), 1.09 (d, *J* = 6.8 Hz, 48H), 2.74 (sept, *J* = 6.8 Hz, 16H), 4.63 (d, *J* = 6.0 Hz, 2H), 6.99 (t, *J* = 1.5 Hz, 4H), 7.17 (d, *J* = 6.8 Hz, 16H), 7.32 (t, *J* = 6.8 Hz, 8H), 7.45 (d, *J* = 1.6 Hz, 8H), 7.71 (d, *J* = 1.6 Hz, 4H), 7.85 (t, *J* = 1.6 Hz, 2H); <sup>13</sup>C NMR (125 MHz, CDCl<sub>3</sub>) δ 24.1 (q), 24.3 (q), 30.4 (d), 122.5 (d), 125.3 (d), 126.4 (d), 127.5 (d), 127.9 (d), 130.0 (d), 130.2 (d), 135.2 (d), 139.0 (s), 140.3 (s), 141.1 (s), 141.6 (s, two singlets are overlapped, judged by HMBC), 142.3(s), 143.2 (s), 146.7 (s); LRMS (FD) *m/z* 1845 [M<sup>+</sup>].

### Synthesis of BpsCH<sub>2</sub>Br **8**.

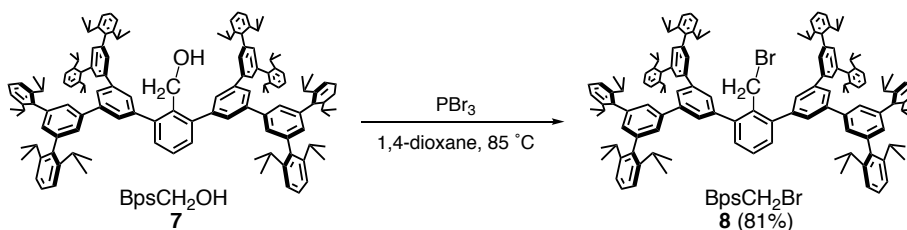

To a solution of **7** (52.3 mg, 28.3 μmol) in 1,4-dioxane (1.5 mL) was added PBr<sub>3</sub> (7.8 μL, 83 μmol), and

the resulting solution was stirred at 85 °C for 18 h. After the reaction mixture was cooled to room temperature, ice-cooled water was added, and the resulting pale yellow solution was stirred at room temperature until it became colorless. After extraction with CHCl<sub>3</sub>, the combined organic layer was dried over MgSO<sub>4</sub>, and the solvent was evaporated in vacuo. The crude mixture was recrystallized from hexane to give **8** (44.0 mg, 23.1 μmol, 81%) as colorless crystals.

**8**: colorless crystals; M.p. >300 °C; <sup>1</sup>H NMR (400 MHz, CDCl<sub>3</sub>) δ 1.04 (d, *J* = 6.8 Hz, 48H), 1.09 (d, *J* = 6.8 Hz, 48H), 2.75 (sept, *J* = 6.8 Hz, 16H), 4.38 (s, 2H), 7.00 (t, *J* = 1.6 Hz, 4H), 7.18 (d, *J* = 8.0 Hz, 16H), 7.32 (t, *J* = 7.6 Hz, 8H), 7.30-7.45 (m, 11H), 7.36 (t, *J* = 7.6 Hz, 2H), 7.50 (d, *J* = 1.6 Hz, 8H), 7.77 (d, *J* = 1.6 Hz, 4H), 7.89 (t, *J* = 1.6 Hz, 2H); <sup>13</sup>C NMR (125 MHz, CDCl<sub>3</sub>) δ 24.1 (q), 24.3 (q), 30.3 (d), 67.1 (t), 122.5 (d), 125.5 (d), 126.4 (d), 127.3 (d), 127.9 (d), 128.2 (d), 130.03 (d), 130.2 (d), 132.9 (s), 139.0 (s), 140.2 (s), 141.0 (s), 141.3 (s), 141.6 (s), 143.5 (s), 146.7 (s); LRMS (FD) *m/z* 1907 [M<sup>+</sup>].

### Synthesis of BpsCH<sub>2</sub>SeCN **9**.

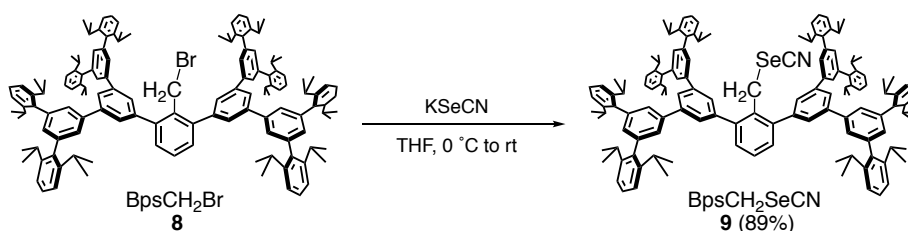

To a mixture of potassium selenocyanate (145.8 mg, 1.03 mmol) in THF (4 mL) was added a solution of **8** (574.6 mg, 0.301 mmol) in THF (4 mL) at 0 °C over 10 min. The reaction mixture was allowed to warm to room temperature and stirred for 3 h. After addition of water, the mixture was extracted with toluene. The organic layer was washed with brine and dried over MgSO<sub>4</sub>. After evaporation of solvent in vacuo, the crude mixture was recrystallized from hexane to give **9** (518.7 mg, 0.268 mmol, 89%) as colorless crystals.

**9**: colorless crystals; M.p. >300 °C; <sup>1</sup>H NMR (400 MHz, CDCl<sub>3</sub>) δ 1.03 (d, *J* = 6.8 Hz, 48H), 1.09 (d, *J* = 6.8 Hz, 48H), 2.75 (sept, *J* = 6.8 Hz, 16H), 4.37 (s, 2H), 7.00 (t, *J* = 1.6 Hz, 4H), 7.17 (d, *J* = 7.6 Hz, 16H), 7.32 (t, *J* = 7.6 Hz, 8H), 7.33 (t, *J* = 7.2 Hz, 1H), 7.37 (d, *J* = 7.2 Hz, 2H), 7.45 (d, *J* = 1.6 Hz, 8H), 7.58 (d, *J* = 1.6 Hz, 4H), 7.89 (t, *J* = 1.6 Hz, 2H); <sup>13</sup>C NMR (125 MHz, CDCl<sub>3</sub>) δ 24.2 (q), 24.3 (q), 30.4 (d), 77.2 (t), 100.8 (s), 122.5 (d), 126.0 (d), 126.4 (d), 127.0 (d), 127.9 (d), 128.3 (d), 130.1 (d), 130.2 (s), 130.3 (d), 138.9 (s), 140.1 (s), 141.1 (s), 141.2 (s), 141.9 (s), 143.5 (s), 146.7 (s); <sup>77</sup>Se NMR (95 MHz, CDCl<sub>3</sub>) δ 244; IR (KBr) 2152 cm<sup>-1</sup> (ν(CN)); LRMS (FD) *m/z* 1934 [M<sup>+</sup>].

### Synthesis of BpsCH<sub>2</sub>SeH **10**.

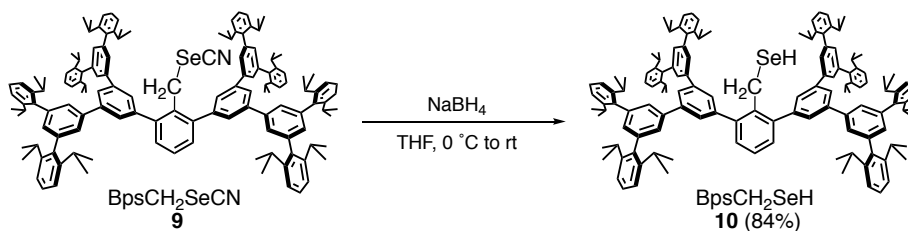

The following reaction and workup were performed under argon atmosphere. A solution of **9** (58.7 mg, 30.3  $\mu\text{mol}$ ) in THF (2 mL) was degassed through three freeze-pump-thaw cycles, and the flask was flushed with argon. To a solution of NaBH<sub>4</sub> (3.3 mg, 87  $\mu\text{mol}$ ) in MeOH (2 mL), which was degassed through three freeze-pump-thaw cycles, was added the degassed solution of **9** at  $-3$   $^\circ\text{C}$  over 5 min. After the reaction mixture was stirred at room temperature for 2 h, degassed water (0.5 mL) was added. Extraction was performed by using CHCl<sub>3</sub> that was degassed through bubbling of argon and then pre-cooled at  $0$   $^\circ\text{C}$ . The combined organic layer was dried over MgSO<sub>4</sub>, and the solvent was evaporated in vacuo. The crude mixture was recrystallized from hexane to give **10** (48.7 mg, 25.5  $\mu\text{mol}$ , 84%) as colorless crystals.

**10**: colorless crystals; M.p. 293.8-296.0  $^\circ\text{C}$  (dec); <sup>1</sup>H NMR (400 MHz, CDCl<sub>3</sub>)  $\delta$  -0.13 (t,  $J$  = 6.4 Hz, 1H), 1.03 (d,  $J$  = 6.8 Hz, 48H), 1.09 (d,  $J$  = 6.8 Hz, 48H), 2.76 (sept,  $J$  = 6.8 Hz, 16H), 3.74 (d,  $J$  = 6.4 Hz, 2H), 7.00 (t,  $J$  = 1.4 Hz, 4H), 7.17 (d,  $J$  = 7.3 Hz, 16H), 7.29-7.35 (m, 11H), 7.48 (d,  $J$  = 1.4 Hz, 8H), 7.69 (d,  $J$  = 1.4 Hz, 4H), 7.88 (t,  $J$  = 1.4 Hz, 2H); <sup>13</sup>C NMR (125 MHz, CDCl<sub>3</sub>)  $\delta$  16.9 (t), 24.2 (q), 24.4 (q), 30.5 (d), 122.6 (d), 125.2 (d), 126.6 (d), 126.8 (d), 127.3 (d), 128.0 (d), 130.0 (d), 130.3 (d), 136.5 (s), 139.1 (s), 140.2 (s), 141.1 (s), 141.5 (s), 142.2 (s), 142.5 (s), 146.8 (s); <sup>77</sup>Se NMR (95 MHz, CDCl<sub>3</sub>)  $\delta$  95; LRMS (FD)  $m/z$  1909 [M<sup>+</sup>].

### Synthesis of BpsCH<sub>2</sub>SeOH **3**.

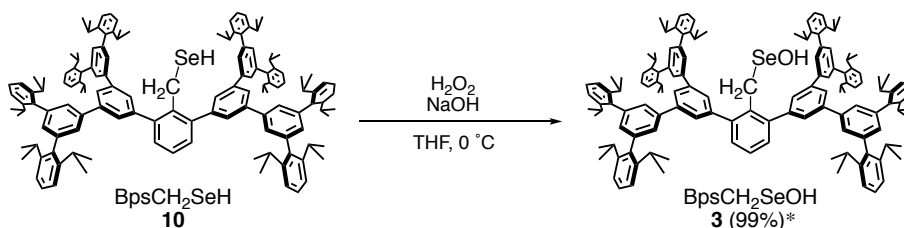

\*Estimated by <sup>1</sup>H NMR.

A stock solution of H<sub>2</sub>O<sub>2</sub> (30%, 30  $\mu\text{L}$ , 0.26 mmol) in THF (1 mL) and that of NaOH (94.3 mg, 2.36 mmol) in H<sub>2</sub>O (8.0 mL) were prepared prior to the reaction. To a solution of **10** (69.0 mg, 36.1  $\mu\text{mol}$ ) in THF (2 mL) were added 0.12 mL of the stock solution of NaOH (36  $\mu\text{mol}$ ) and 125  $\mu\text{L}$  of that of H<sub>2</sub>O<sub>2</sub> (36  $\mu\text{mol}$ ) at  $0$   $^\circ\text{C}$ , and the reaction mixture was stirred for 2 h at  $0$   $^\circ\text{C}$ . Then, the solvent was evaporated in vacuo, and NMR measurement of the crude mixture in C<sub>6</sub>D<sub>6</sub> showed that selenenic acid **3** was formed in 99% yield. Selenenic acid **3** can also prepared from oxidation of **10** with NaBO<sub>3</sub>. To a solution of **10** (16.9 mg, 8.9  $\mu\text{mol}$ ) was added an aqueous solution of NaBO<sub>3</sub> (0.18 M, 106  $\mu\text{L}$ , 19  $\mu\text{mol}$ ) at  $-2$   $^\circ\text{C}$ . The solution was

stirred at the same temperature for 30 min and then at room temperature for 1 h. After treatment with 3% aq. NaHSO<sub>3</sub>, the mixture was extracted with CHCl<sub>3</sub> under an argon atmosphere. The combined organic layer was dried over MgSO<sub>4</sub> and evaporated in vacuo. <sup>1</sup>H NMR measurement of the crude mixture in C<sub>6</sub>D<sub>6</sub> showed that **3** was formed quantitatively.

**3**: colorless crystals; M.p. 250.0-251.5 °C; <sup>1</sup>H NMR (400 MHz, C<sub>6</sub>D<sub>6</sub>) δ 1.07 (d, *J* = 6.8 Hz, 48H), 1.14 (d, *J* = 6.8 Hz, 48H), 2.03 (s, 1H), 2.99 (sept, *J* = 6.9 Hz, 16H), 4.18 (s, 2H), 6.91-7.02 (A<sub>2</sub>B pattern, 3H), 7.10 (t, *J* = 1.6 Hz, 4H), 7.20 (d, *J* = 7.6 Hz, 16H), 7.34 (t, *J* = 7.6 Hz, 8H), 7.67 (d, *J* = 1.6 Hz, 8H), 7.77 (d, *J* = 1.6 Hz, 4H), 8.06 (d, *J* = 1.6 Hz, 2H); <sup>13</sup>C NMR (125 MHz, C<sub>6</sub>D<sub>6</sub>) δ 24.4 (q), 24.6 (d), 30.8 (d), 35.5 (t), 122.0 (d), 126.5 (d), 127.2 (d), 128.4 (d), 128.7 (d), 130.1 (d), 130.9 (d), 132.8 (d), 139.4 (s), 141.6 (s), 141.9 (s), 142.1 (s), 142.3 (s), 142.8 (s), 143.1 (s), 146.9 (s); <sup>77</sup>Se NMR (95 MHz, C<sub>6</sub>D<sub>6</sub>) δ 1243; IR (CHCl<sub>3</sub>) ν 3511 cm<sup>-1</sup> (OH). Anal. Calcd. for C<sub>139</sub>H<sub>160</sub>OSe C, 86.69; H, 8.37. Found: C, 86.43; H, 8.43.

### Reaction of **3** with dimedone (**1**).

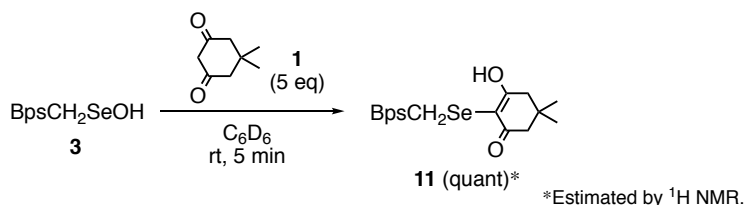

To **3** (15.0 mg, 7.8 μmol) in an NMR tube with a J-young valve was added a solution of **1** (5.5 mg, 39 μmol) in C<sub>6</sub>D<sub>6</sub> (0.6 mL) at room temperature, and the tube was carefully sealed. In the <sup>1</sup>H NMR measurement after 5 min, selenide **11** was formed quantitatively. After extraction with CHCl<sub>3</sub>, the combined organic layer was dried over MgSO<sub>4</sub>, and the solvent was evaporated in vacuo. The crude mixture was purified by PTLC (hexane:CHCl<sub>3</sub> = 2:1) to afford **11** (8.0 mg, 3.9 μmol, 50%) as colorless crystals

**11**: colorless crystals; M.p. 225.0-228.0 °C; <sup>1</sup>H NMR (400 MHz, C<sub>6</sub>D<sub>6</sub>) δ 0.46 (s, 6H), 1.06 (d, *J* = 6.8 Hz, 48H), 1.14 (d, *J* = 6.8 Hz, 48), 1.63 (s, 2H), 1.69 (s, 2H), 3.02 (sept, *J* = 6.8 Hz, 16H), 3.81 (s, 2H), 6.80 (s, 1H), 6.92-6.99 (A<sub>2</sub>B pattern, 3H), 7.10 (t, *J* = 1.4 Hz, 4H), 7.18 (d, *J* = 7.2 Hz, 16H), 7.32 (t, *J* = 7.2 Hz, 8H), 7.81 (d, *J* = 1.4 Hz, 8H), 8.01 (d, *J* = 1.4 Hz, 4H), 8.16 (t, *J* = 1.4 Hz, 2H); <sup>13</sup>C NMR (100 MHz, C<sub>6</sub>D<sub>6</sub>) δ 24.5 (q), 24.6 (q), 27.8 (q), 29.0 (s), 30.8 (d), 41.2 (t), 50.3 (t), 106.3 (s), 122.9 (d), 126.2 (d), 127.1 (d), 128.5 (d), 128.6 (d), 130.6 (d), 130.9 (d), 132.0 (d), 139.6 (s), 141.8 (s), 142.4 (s), 142.66 (s), 142.74 (s), 143.8 (s), 147.0 (s), 174.6 (s), 190.6 (s); <sup>77</sup>Se NMR (95 MHz, C<sub>6</sub>D<sub>6</sub>) δ 79.

### Reaction of **3** with acetylacetone (**12**).

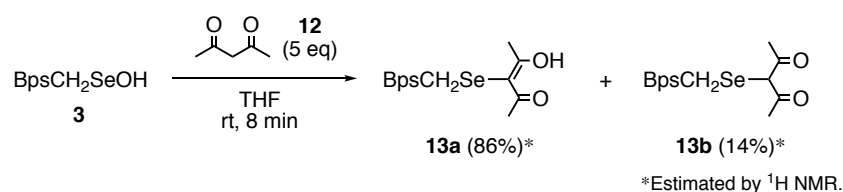

To a solution of **3** (169 mg, 88.0  $\mu$ mol) in THF (6.6 mL) was added **12** (45  $\mu$ L, 0.44  $\mu$ mol) at room temperature. After the reaction mixture was allowed to react for 8 min, the solvent was evacuated in vacuo to afford a mixture of **13a** and **13b** (**13a:13b** = 86:14, estimated by  $^1\text{H}$  NMR). The crude mixture was purified by silica gel column chromatography (hexane: $\text{CHCl}_3$  = 3:1), and subsequent reprecipitation from hexane afforded a mixture of **13a** and **13b** (110 mg, 54.7  $\mu$ mol, 63%; **13a:13b** = 93:7, estimated by  $^1\text{H}$  NMR).

**13a** :  $^1\text{H}$  NMR (500 MHz,  $\text{CDCl}_3$ )  $\delta$  1.02 (d,  $J$  = 6.9 Hz, 48H), 1.09 (d,  $J$  = 6.9 Hz, 48H), 1.66 (s, 6H), 2.73 (sept,  $J$  = 6.9 Hz, 16H), 3.89 (s, 2H), 3.84 (s, 2H), 6.99 (t,  $J$  = 1.4 Hz, 3H), 7.17 (d,  $J$  = 7.8 Hz, 16H), 7.25-7.33 (m, 11H), 7.42 (d,  $J$  = 1.7 Hz, 8H), 7.62 (d,  $J$  = 1.7 Hz, 4H), 7.78 (t,  $J$  = 1.7 Hz, 2H);  $^{13}\text{C}$  NMR (125 MHz,  $\text{CDCl}_3$ )  $\delta$  24.39 (q), 24.54 (q), 25.39 (q), 28.72 (t), 30.64 (d), 99.93 (s), 125.54 (d), 126.94 (d), 127.67 (d), 128.20 (d), 130.36 (d), 130.43 (d), 132.67 (s), 139.18 (s), 140.67 (s), 141.36 (s), 141.83 (s), 142.71 (s), 143.21 (s), 197.16 (s);  $^{77}\text{Se}$  NMR (95 MHz,  $\text{CDCl}_3$ )  $\delta$  247.

**13b** :  $^1\text{H}$  NMR (500 MHz,  $\text{CDCl}_3$ )  $\delta$  1.03 (d,  $J$  = 6.6 Hz, 48H), 1.08 (d,  $J$  = 6.8 Hz, 48H), 1.62 (s, 6H), 2.73 (sept,  $J$  = 6.9 Hz, 16H), 3.64 (s, 2H), 3.84 (s, 2H), 6.99 (t,  $J$  = 1.4 Hz, 3H), 7.17 (d,  $J$  = 7.8 Hz, 16H), 7.27-7.33 (m, 11H), 7.42 (d,  $J$  = 1.5 Hz, 8H), 7.59 (d,  $J$  = 1.5 Hz, 4H), 7.80 (t,  $J$  = 1.5 Hz, 2H);  $^{77}\text{Se}$  NMR (95 MHz,  $\text{CDCl}_3$ )  $\delta$  329.

The following data were obtained for a mixture of **13a** and **13b** (**13a:13b** = 92:8); M.p. >300  $^\circ\text{C}$ ; LRMS (FD)  $m/z$  2007 [ $\text{M}^+$ ]; Anal. Calcd. for  $\text{C}_{144}\text{H}_{166}\text{O}_2\text{Se}$  C, 86.14; H, 8.33. Found: C, 86.11; H, 8.39.

#### Reaction of **3** with cyclooctyne (**14**).

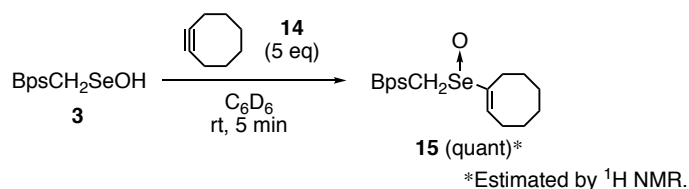

A stock solution of cyclooctyne (**14**) (5.4  $\mu$ L, 43  $\mu$ mol) in  $\text{C}_6\text{D}_6$  (0.40 mL) was prepared. To a solution of **2** (14.0 mg, 7.3  $\mu$ mol) in  $\text{C}_6\text{D}_6$  (0.40 mL) was added a part of the stock solution of **14** (0.20 mL, 22  $\mu$ mol as **14**) at room temperature. In the  $^1\text{H}$  NMR measurement after 5 min, it was found that **15** was formed quantitatively. The reaction mixture was extracted with  $\text{CHCl}_3$ , and the combined organic layer was dried over  $\text{MgSO}_4$ . After evaporation of the solvent in vacuo, the resulting crude mixture was purified by PTLC (hexane: $\text{CHCl}_3$  = 2:1) to afford **15** (9.5 mg, 4.7  $\mu$ mol, 65%) as colorless solids.

**15**: colorless solids; M.p. 227.0-229.0  $^\circ\text{C}$ ;  $^1\text{H}$  NMR (400 MHz,  $\text{C}_6\text{D}_6$ )  $\delta$  1.07 (d,  $J$  = 6.8 Hz, 48H), 1.12 (d,  $J$  = 6.8 Hz, 48H), 1.10-1.39 (m, 8H), 1.44-1.55 (m, 1H), 1.66-1.91 (m, 3H), 2.99 (sept,  $J$  = 6.8 Hz, 16H), 3.71 (d,  $J$  = 12.0 Hz, 1H), 3.83 (d,  $J$  = 12.0 Hz, 1H), 5.88 (t,  $J$  = 8.0 Hz, 1H), 6.92-7.04 ( $\text{A}_2\text{B}$  pattern, 3H), 7.10 (brs, 4H), 7.18 (d,  $J$  = 7.6 Hz, 16H), 7.31 (t,  $J$  = 7.6 Hz, 8H), 7.65-8.01 (br, 12H), 8.17 (t,  $J$  = 1.6 Hz, 2H);  $^{13}\text{C}$  NMR (125 MHz,  $\text{C}_6\text{D}_6$ )  $\delta$  24.1 (q), 24.3 (q), 24.7 (t), 25.3 (t), 25.8 (t), 26.3 (t), 28.1 (t), 29.4 (t), 30.6 (d), 51.6 (t), 122.6 (d), 125.5 (d), 126.9 (d), 127.1 (d), 128.2 (d), 129.2 (d), 130.2 (d), 130.9 (d), 132.5 (d), 139.2

(s), 141.1 (s), 141.6 (s), 142.1 (s), 142.5 (s), 142.9 (s), 143.5 (s), 146.6 (s), 146.7 (s);  $^{77}\text{Se}$  NMR (95 MHz,  $\text{C}_6\text{D}_6$ )  $\delta$  920; IR (KBr)  $\nu$  1055  $\text{cm}^{-1}$  (Se=O).

### Reactions of **3** with acetamide (**16**).

(i) Under acidic conditions

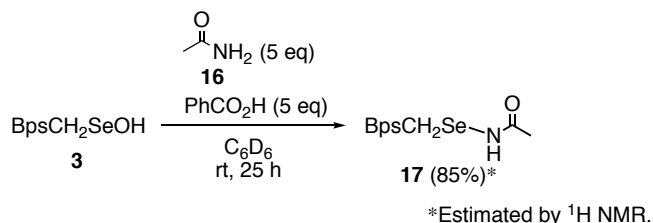

The reaction was carried out in an NMR tube with a J-young valve. To a solution of **3** (13.5 mg, 7.0  $\mu\text{mol}$ ) in  $\text{C}_6\text{D}_6$  (0.6 mL) was added acetamide **16** (2.2 mg, 37  $\mu\text{mol}$ ), benzoic acid (4.4 mg, 36  $\mu\text{mol}$ ), and bis(trimethylsilyl)methane (1 drop, internal standard). The tube was carefully sealed, and the reaction at room temperature was monitored by  $^1\text{H}$  NMR spectroscopy. After 25 h, *N*-selenoamide **17** was formed in 85% yield, which was confirmed by  $^1\text{H}$  NMR measurement. The reaction mixture was opened in air and extracted with chloroform. The combined organic layer was dried over  $\text{MgSO}_4$ , and the solvent was evaporated in vacuo. The resulting crude mixture was purified by PTLC (hexane: $\text{CHCl}_3$  = 1:1) to give **17** (5.0 mg, 2.5  $\mu\text{mol}$ , 36%).

(ii) Under basic conditions

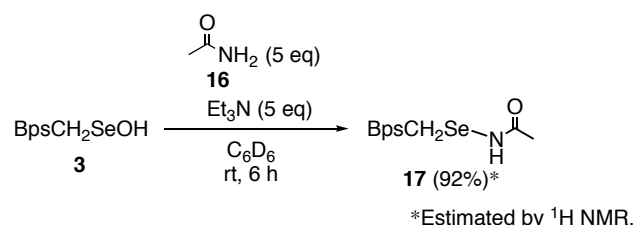

The reaction was carried out in an NMR tube with a J-young valve at room temperature. To a solution of **3** (22.8 mg, 11.9  $\mu\text{mol}$ ) in  $\text{C}_6\text{D}_6$  (0.6 mL) was added acetamide **16** (2.7 mg, 46  $\mu\text{mol}$ ), triethylamine (4.7  $\mu\text{L}$ , 47  $\mu\text{mol}$ ), and bis(trimethylsilyl)methane (1 drop, internal standard). The tube was carefully sealed, and the reaction at room temperature was monitored by  $^1\text{H}$  NMR spectroscopy. After 6 h, **17** was formed in 92% yield, which was confirmed by  $^1\text{H}$  NMR measurement. The reaction mixture was opened in air and extracted with chloroform. The combined organic layer was dried over  $\text{MgSO}_4$ , and the solvent was evaporated in vacuo. The crude mixture was purified by PTLC (hexane: $\text{CHCl}_3$  = 1:1) to give **17** (12.4 mg, 6.3  $\mu\text{mol}$ , 53%). **17**: colorless solids; Mp 227.0-229.0  $^\circ\text{C}$ ;  $^1\text{H}$  NMR (500 MHz,  $\text{CDCl}_3$ , 320 K)  $\delta$  1.05 (d,  $J$  = 6.8 Hz, 48H), 1.12 (d,  $J$  = 6.8 Hz, 48H), 1.48 (s, 3H,  $\text{CH}_3\text{C}(=\text{O})\text{NH}$ ), 2.77 (sept,  $J$  = 6.8 Hz, 16H), 4.26 (brs, 2H,  $\text{CH}_2\text{Se}$ ), 5.27 (s, 1H, NH), 7.01 (t,  $J$  = 1.2 Hz, 4H), 7.18 (d,  $J$  = 7.8 Hz, 16H), 7.29-7.37 (m, 10H), 7.47 (d,  $J$  = 1.2 Hz),

7.62 (br, 4H), 7.88 (br, 2H);  $^{13}\text{C}$  NMR (500 MHz,  $\text{CDCl}_3$ , 320 K)  $\delta$  21.2 (br, q), 24.2 (q), 24.3 (q), 30.5 (d), 34.8 (br, t), 122.6 (d, one doublet overlapped), 125.4 (br, d), 126.5 (d), 127.4 (d), 128.0 (d), 130.0 (d), 130.5 (d), 139.0 (s, one singlet overlapped), 140.2 (s), 141.3 (s), 141.7 (s), 142.6 (br, s), 146.8 (s), 170.6 (br, s, C=O);  $^{77}\text{Se}$  NMR (95 MHz,  $\text{CDCl}_3$ , 320 K)  $\delta$  690.

#### Reaction of **3** with benzylamine.

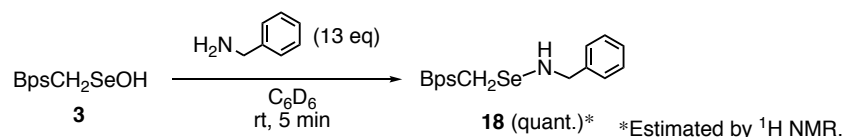

The reaction was carried out in an NMR tube with a J-young valve at room temperature. To a solution of **3** (8.2 mg, 4.3  $\mu\text{mol}$ ) in  $\text{C}_6\text{D}_6$  (0.6 mL) was added benzylamine (6.0  $\mu\text{L}$ , 55  $\mu\text{mol}$ ) and bis(trimethylsilyl)methane (1 drop, internal standard). The tube was carefully sealed, and the reaction was monitored by  $^1\text{H}$  NMR spectroscopy. After 30 min, selenenamide **18** was formed quantitatively, which was confirmed by  $^1\text{H}$  NMR measurement. Purification by PTLC was unsuccessful due to complete decomposition of **18**. Isolation of **18** was accomplished in another experiment through precipitation from  $\text{CHCl}_3/\text{CH}_3\text{CN}$ , where **18** (51.5 mg, 25.5  $\mu\text{mol}$ , 68%) was obtained from **3** (72.6 mg, 37.7  $\mu\text{mol}$ ) and benzylamine (21  $\mu\text{L}$ , 0.19 mmol).

**18**: white crystals; Mp 226.5–228.0  $^\circ\text{C}$ ;  $^1\text{H}$  NMR (400 MHz,  $\text{C}_6\text{D}_6$ )  $\delta$  1.02 (d,  $J$  = 6.8 Hz, 48H), 1.07 (d,  $J$  = 6.8 Hz, 48H), 2.94 (sept,  $J$  = 6.8 Hz, 16H), 3.50 (s, 2H), 3.66 (s, 2H), 6.73–6.75 (m, 3H), 6.80–6.92 (m, 5H), 7.04 (t,  $J$  = 1.5 Hz, 4H), 7.13 (d,  $J$  = 7.6 Hz, 16H), 7.28 (t,  $J$  = 7.6 Hz, 8H), 7.63 (d,  $J$  = 1.5 Hz, 8H), 7.82 (d,  $J$  = 1.6 Hz, 4H), 8.00 (t,  $J$  = 1.6 Hz);  $^{13}\text{C}$  NMR (100 MHz,  $\text{C}_6\text{D}_6$ )  $\delta$  24.1 (q), 24.3 (q), 30.6 (d), 58.8 (t), 86.7 (t), 122.7 (d), 125.4 (d), 126.3 (s), 126.9 (d), 127.8 (d), 128.0 (d), 128.2 (d), 128.3 (d), 128.5 (d), 129.8 (d), 130.7 (d), 134.0 (d), 139.2 (s), 140.9 (s), 141.3 (s), 141.7 (s), 141.9 (s), 142.8 (s), 142.9 (s), 146.7 (s);  $^{77}\text{Se}$  NMR (95 MHz,  $\text{C}_6\text{D}_6$ )  $\delta$  709.

## 2. NMR data

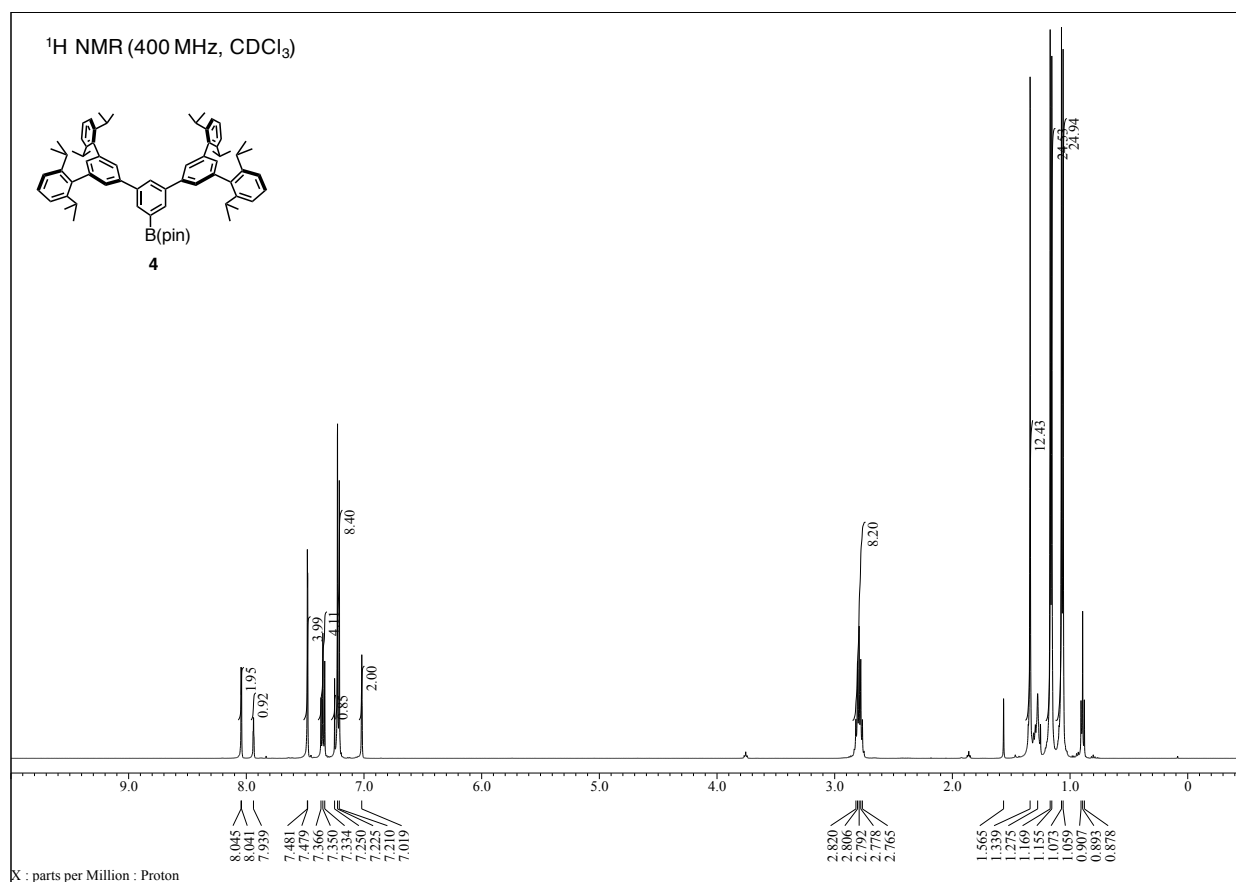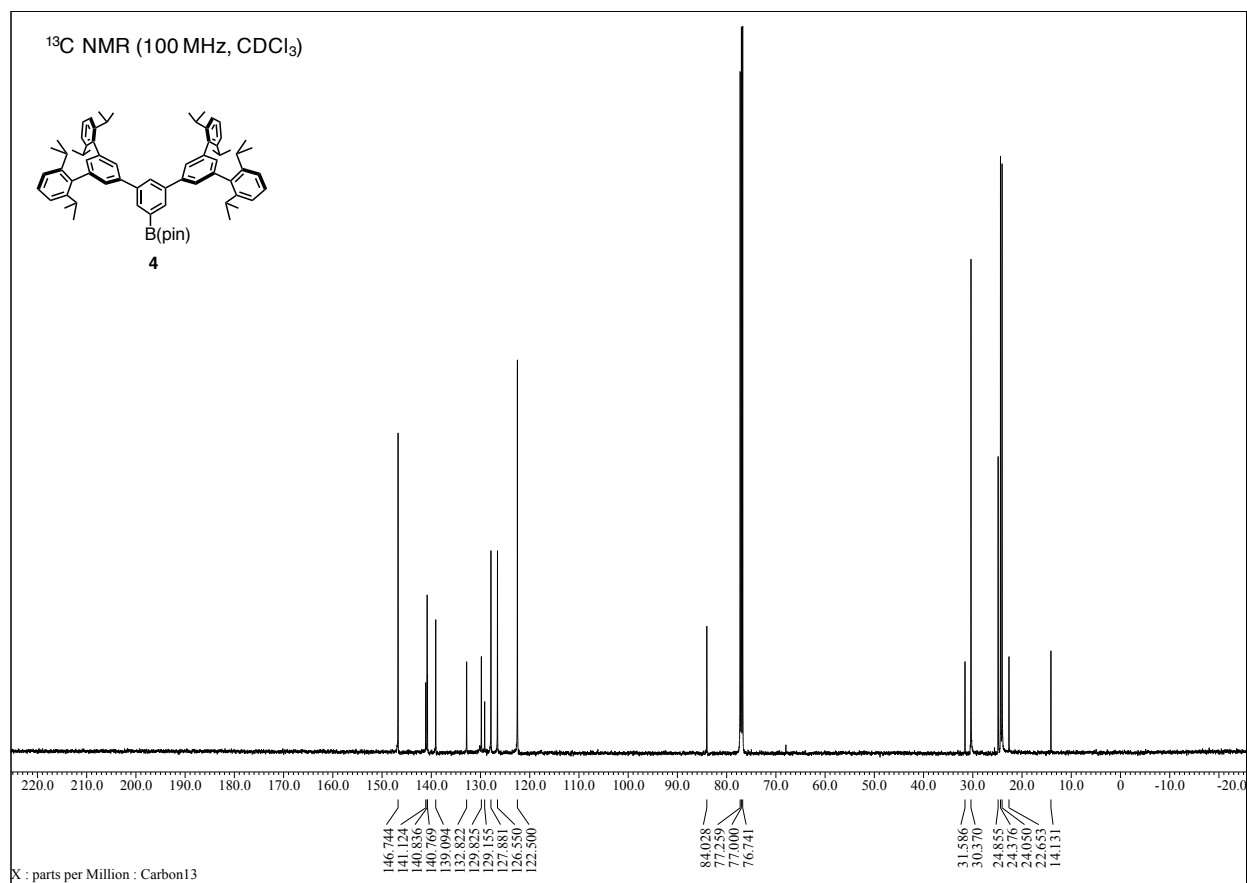



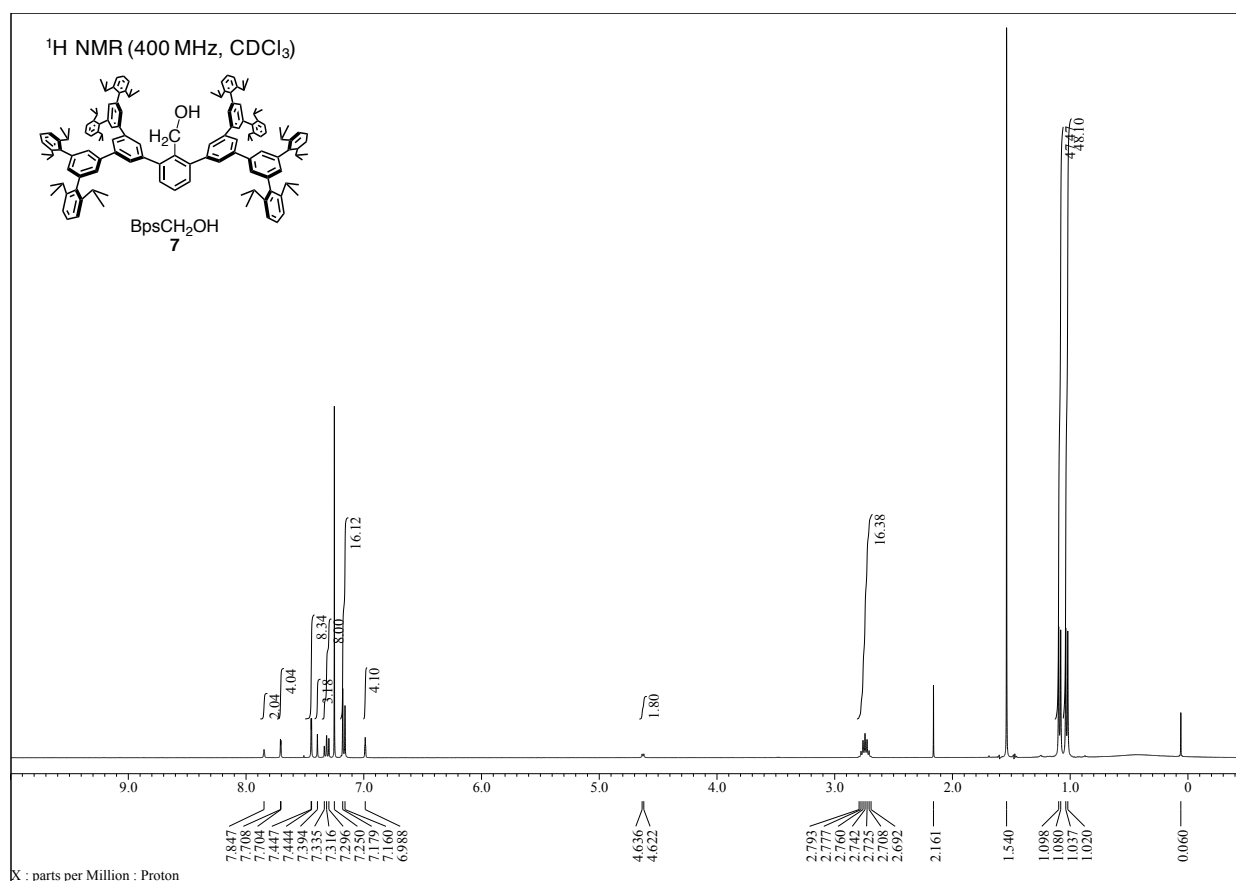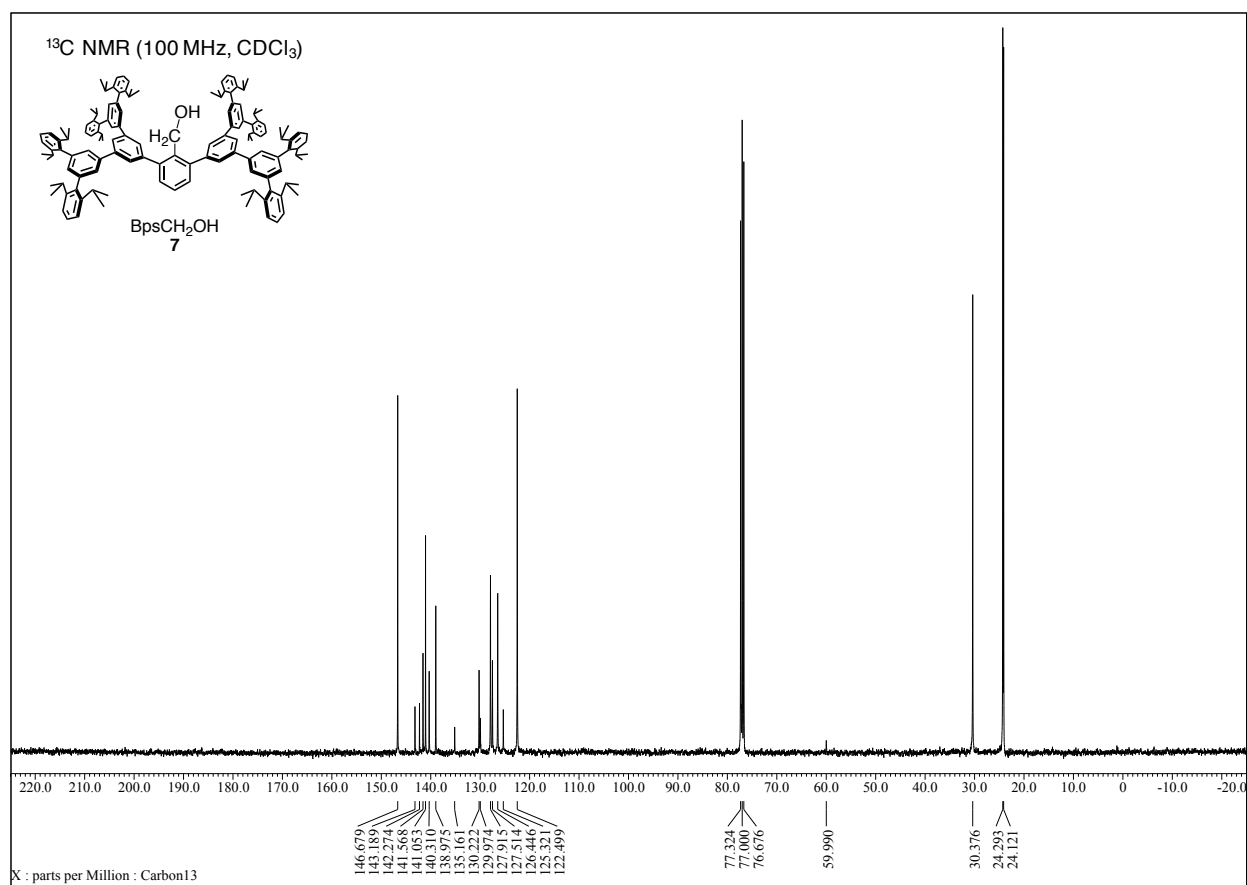

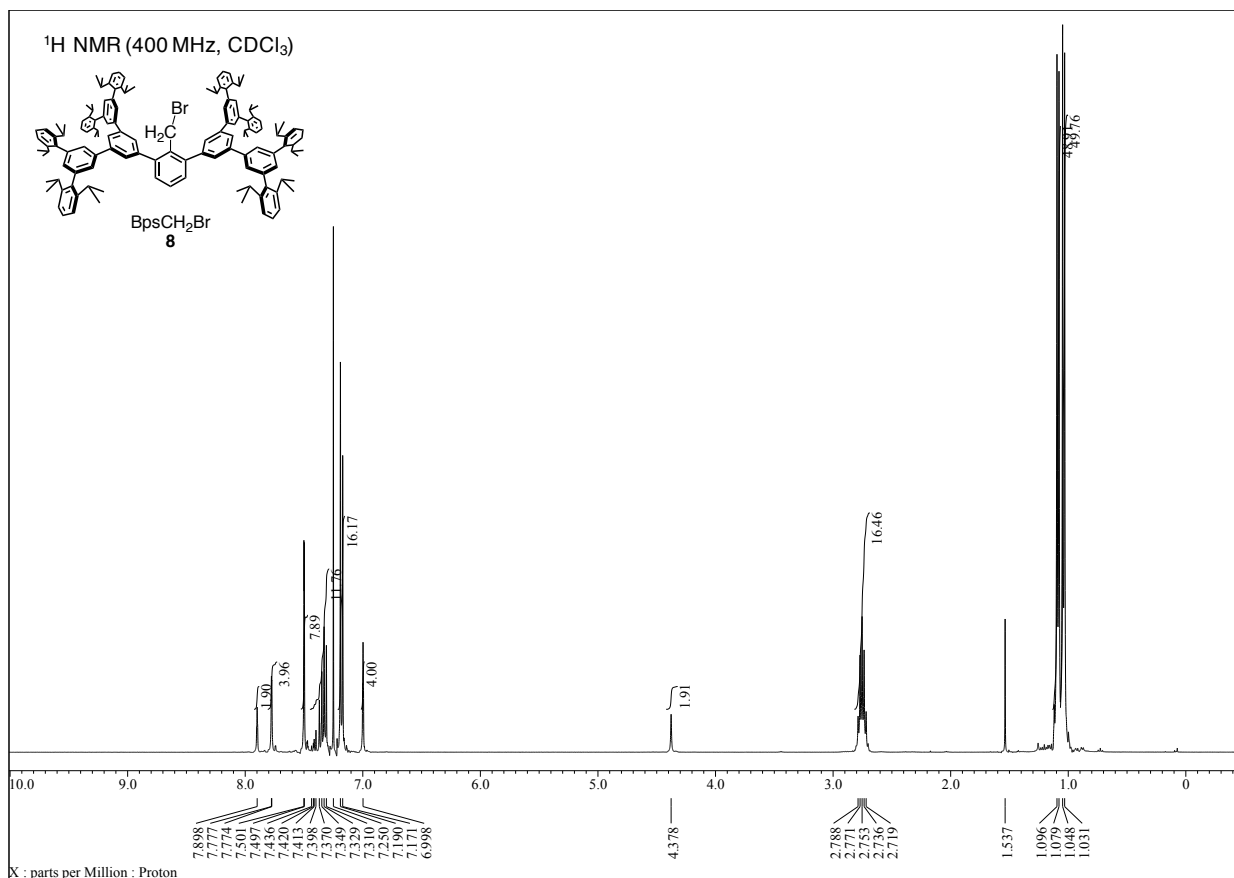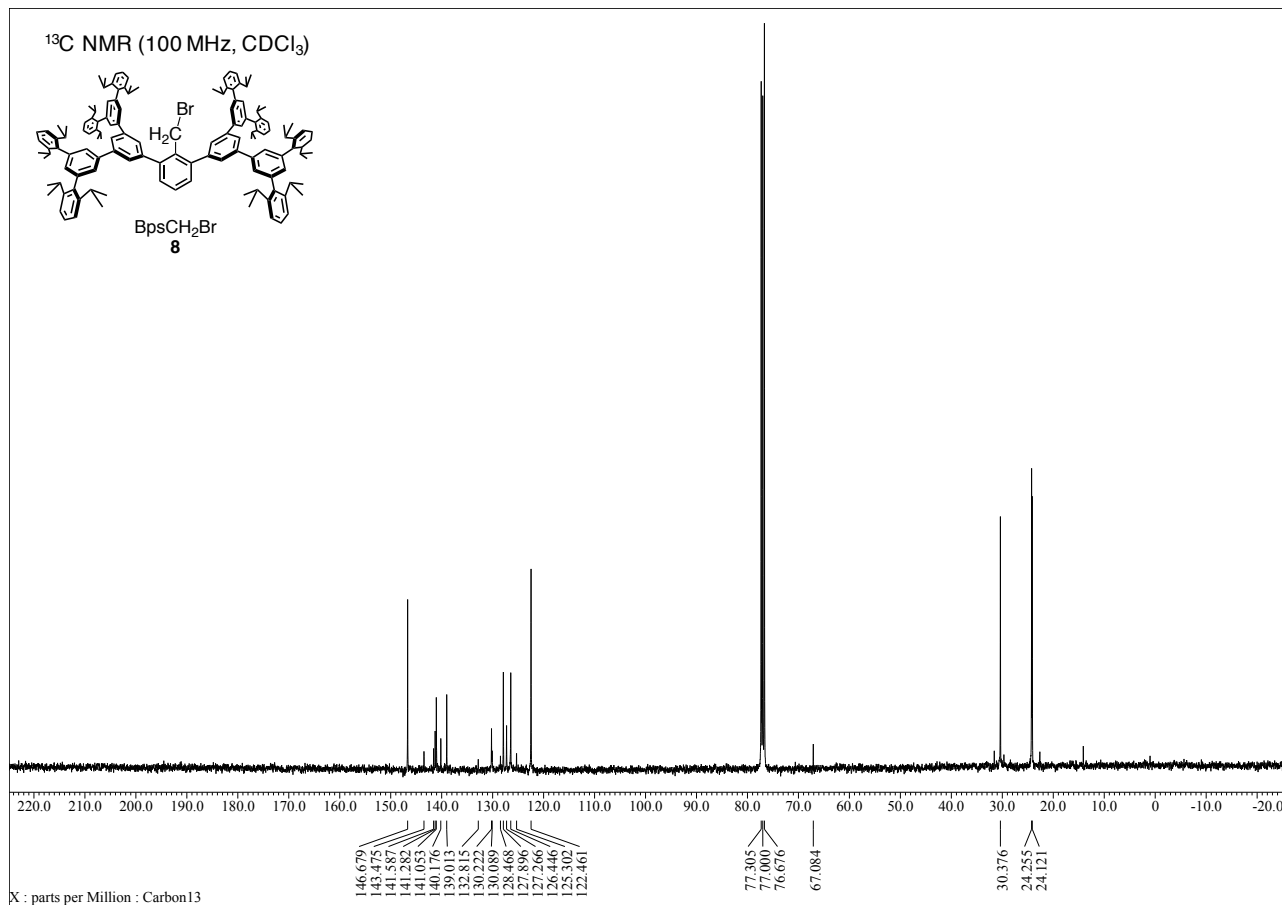

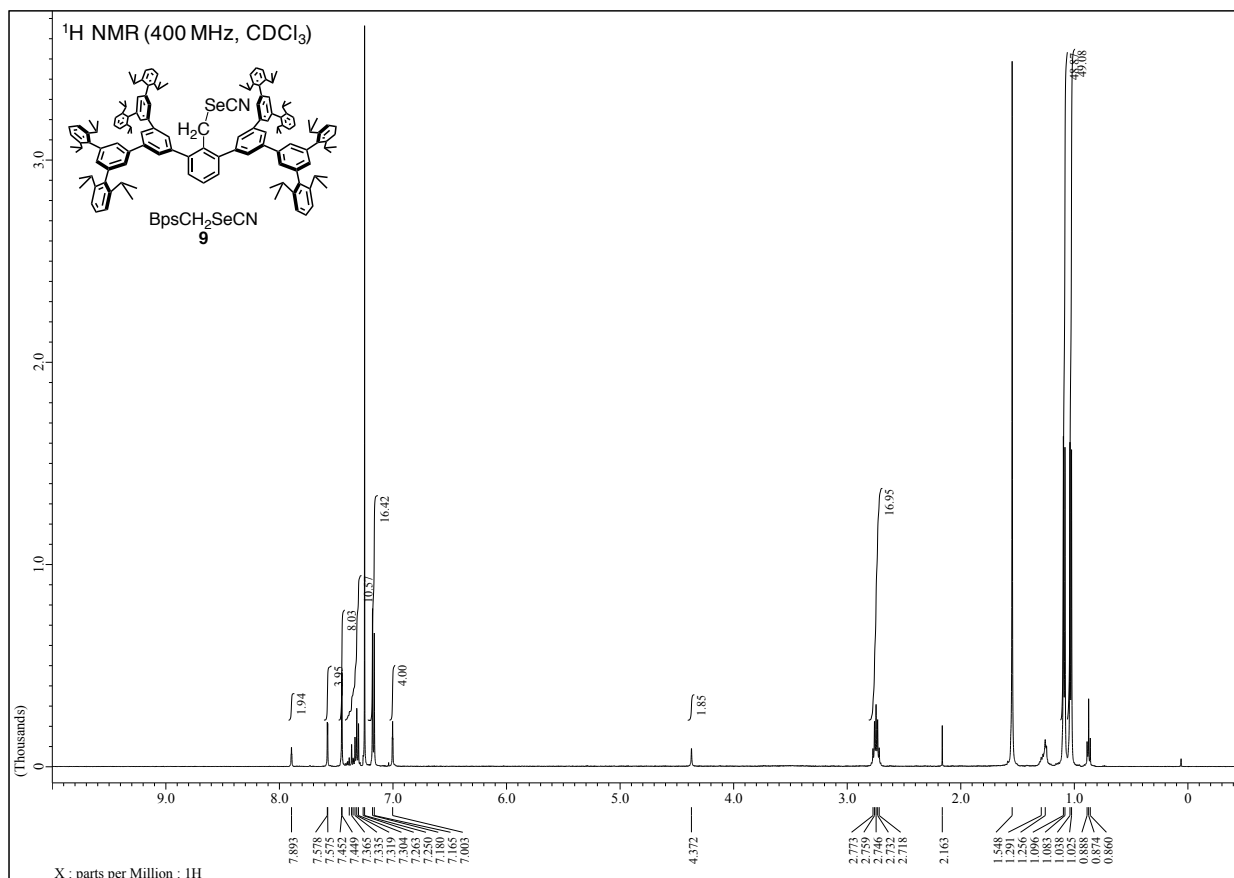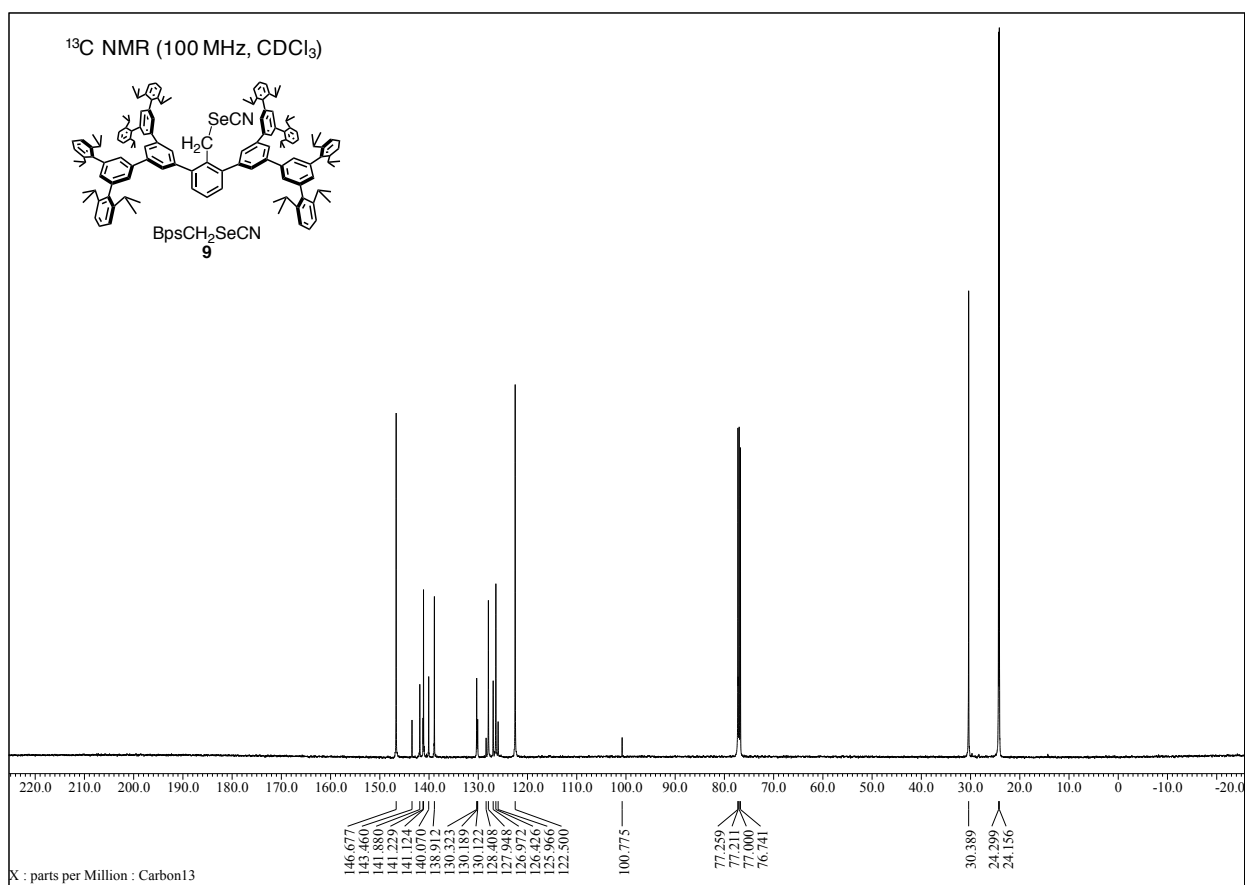

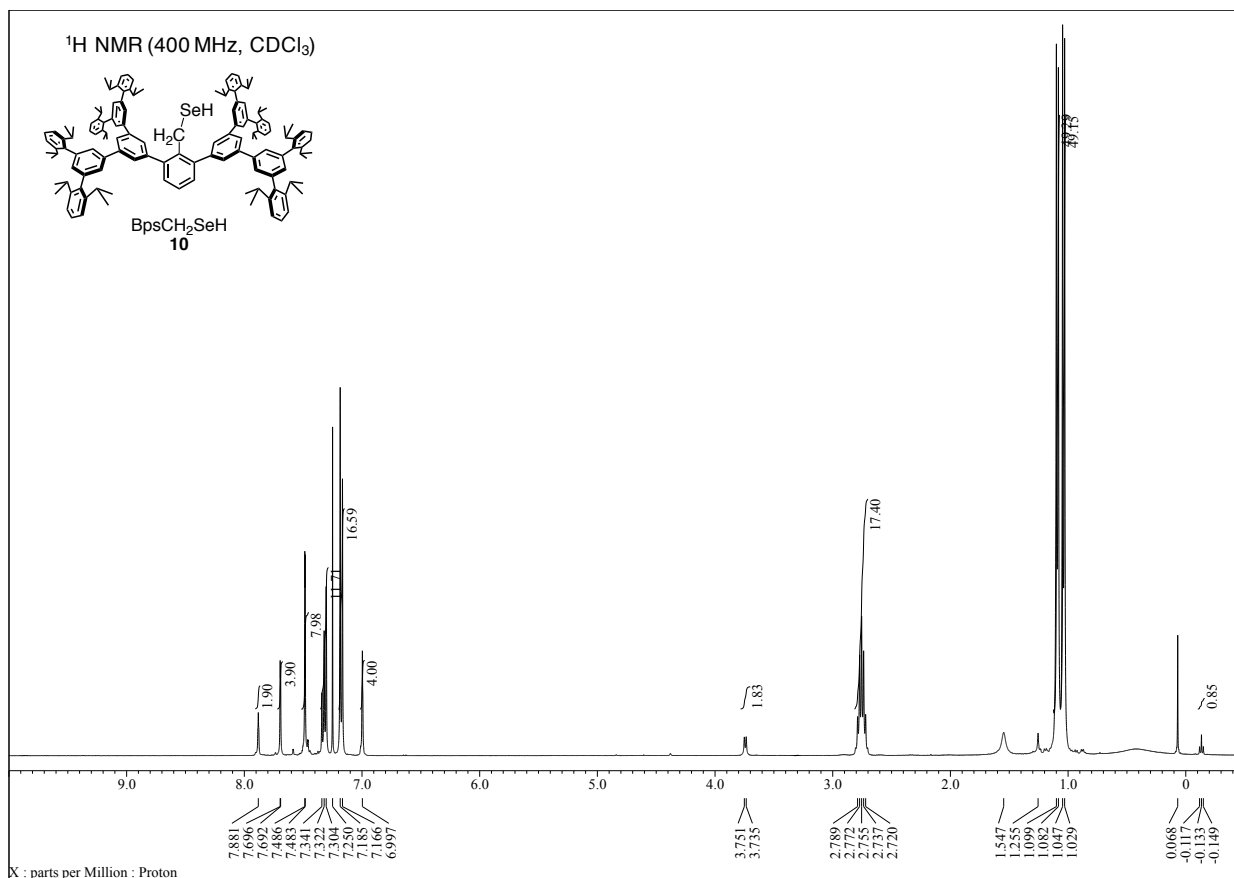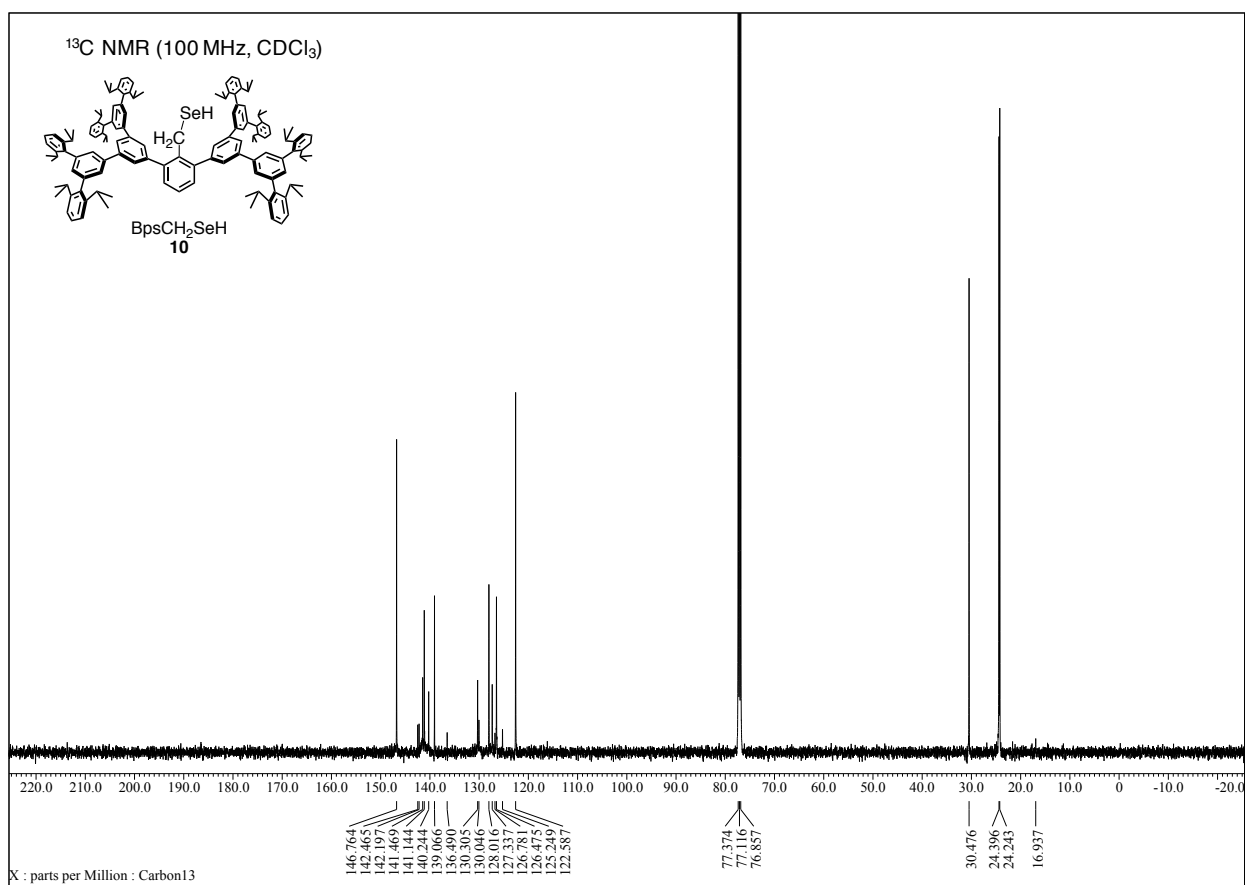

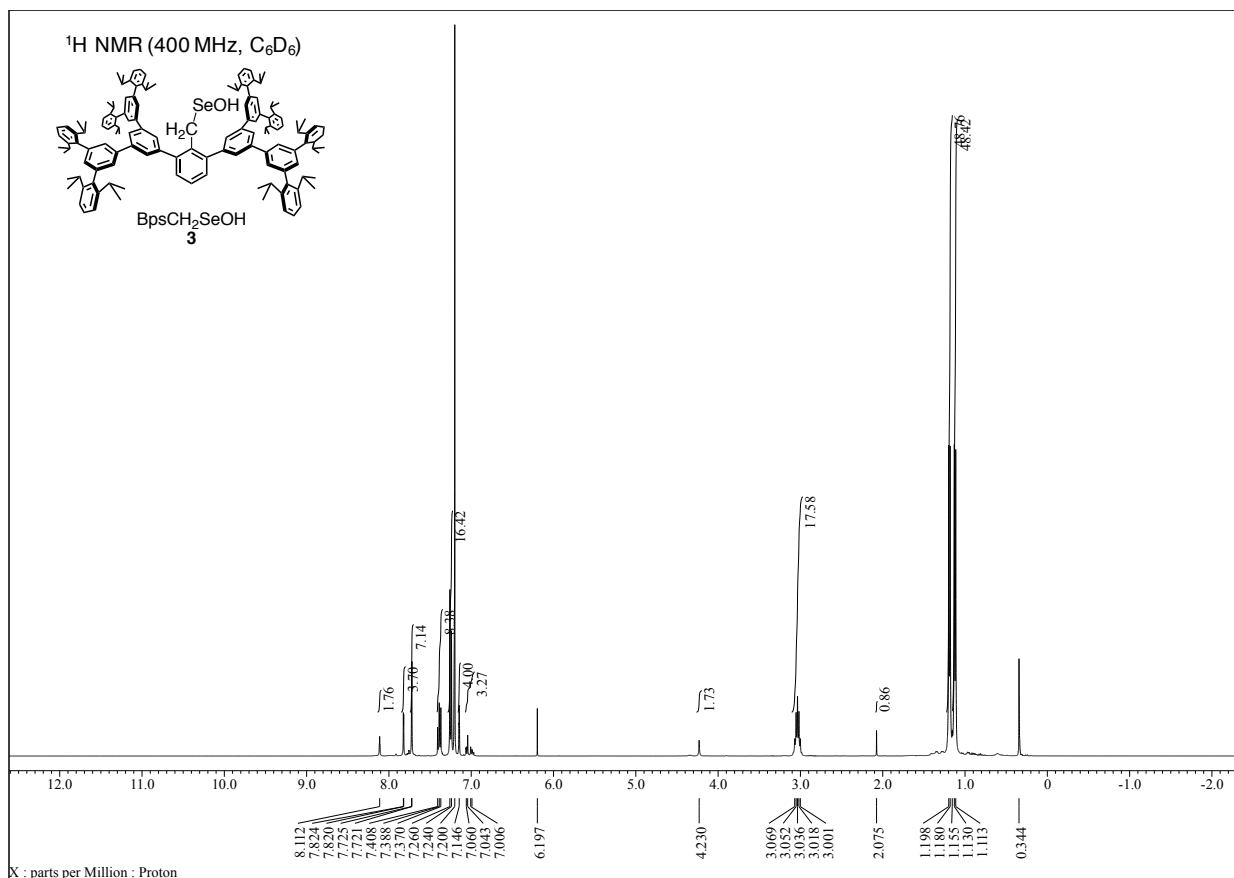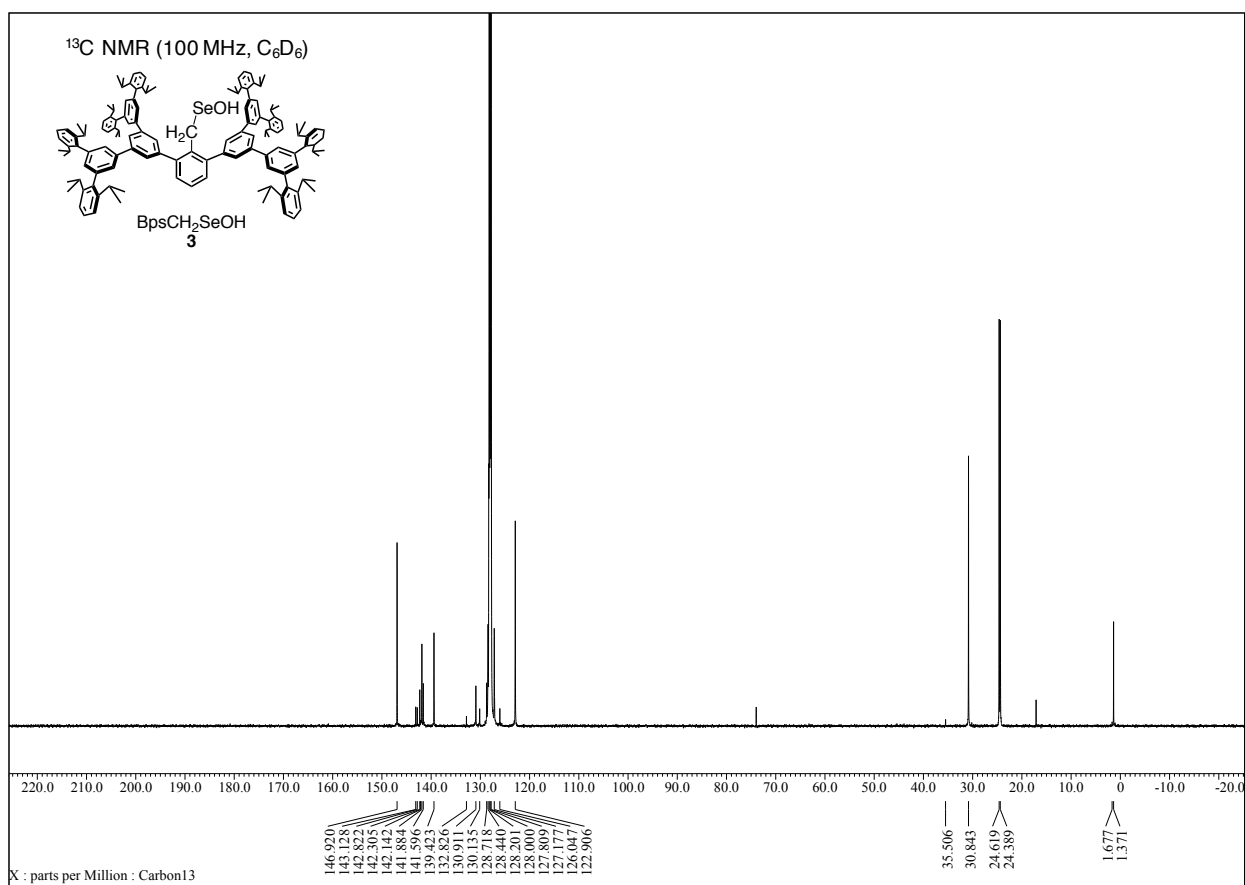

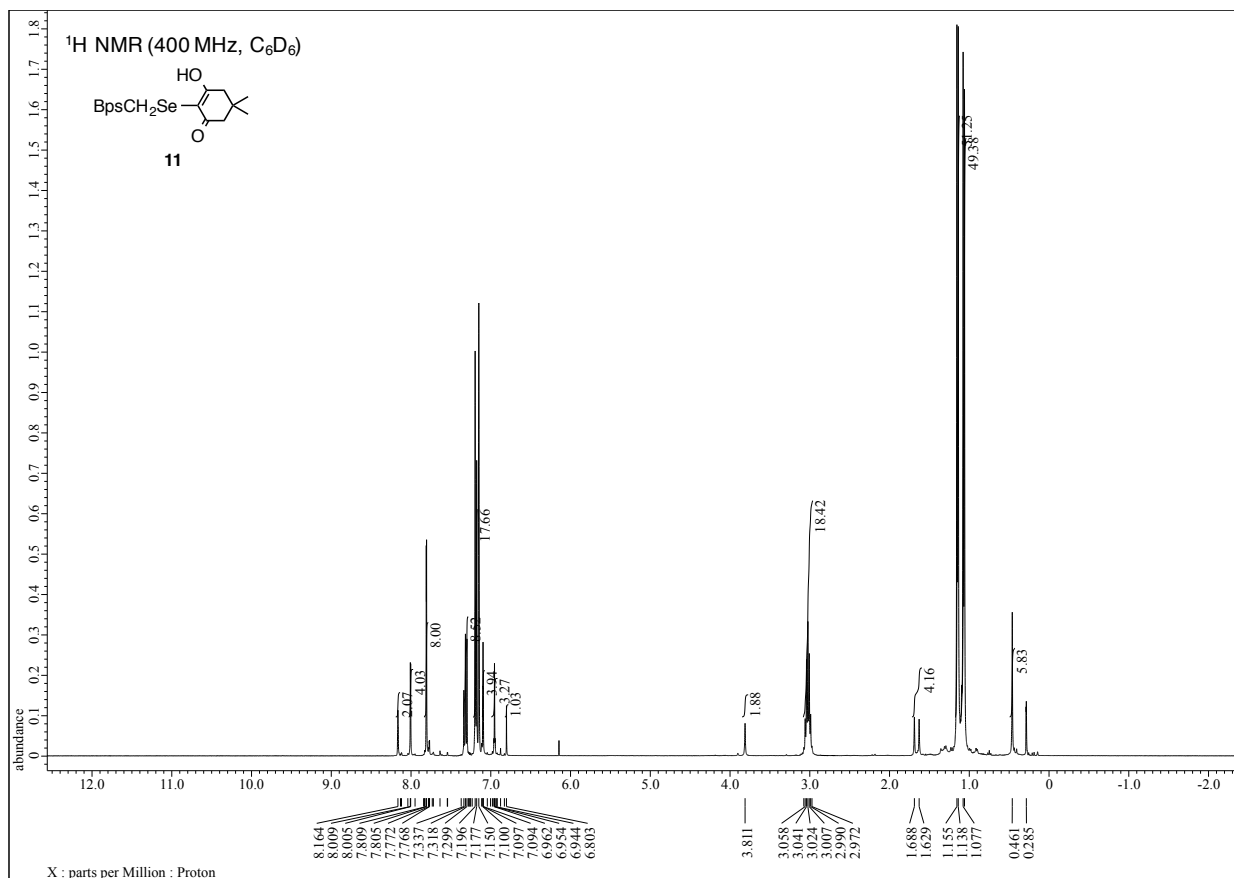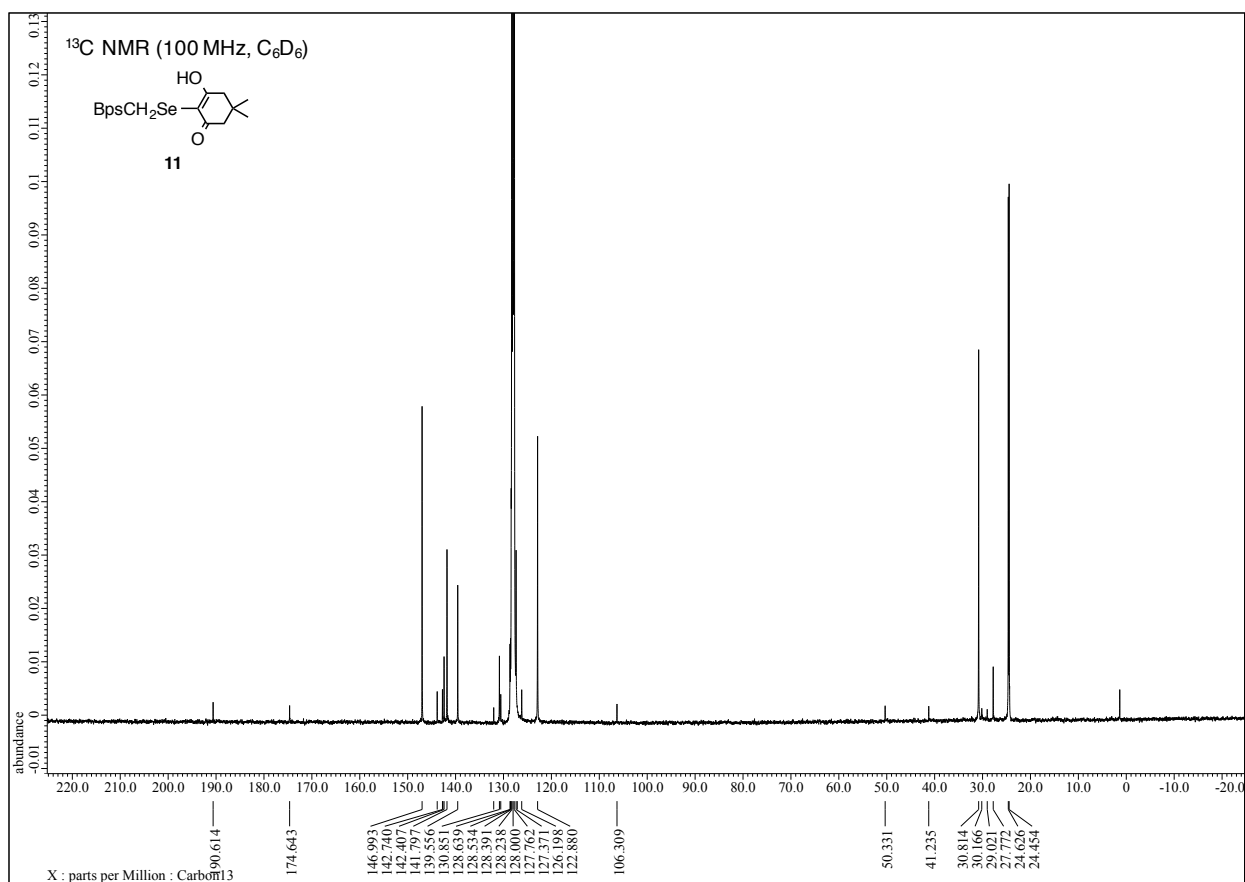

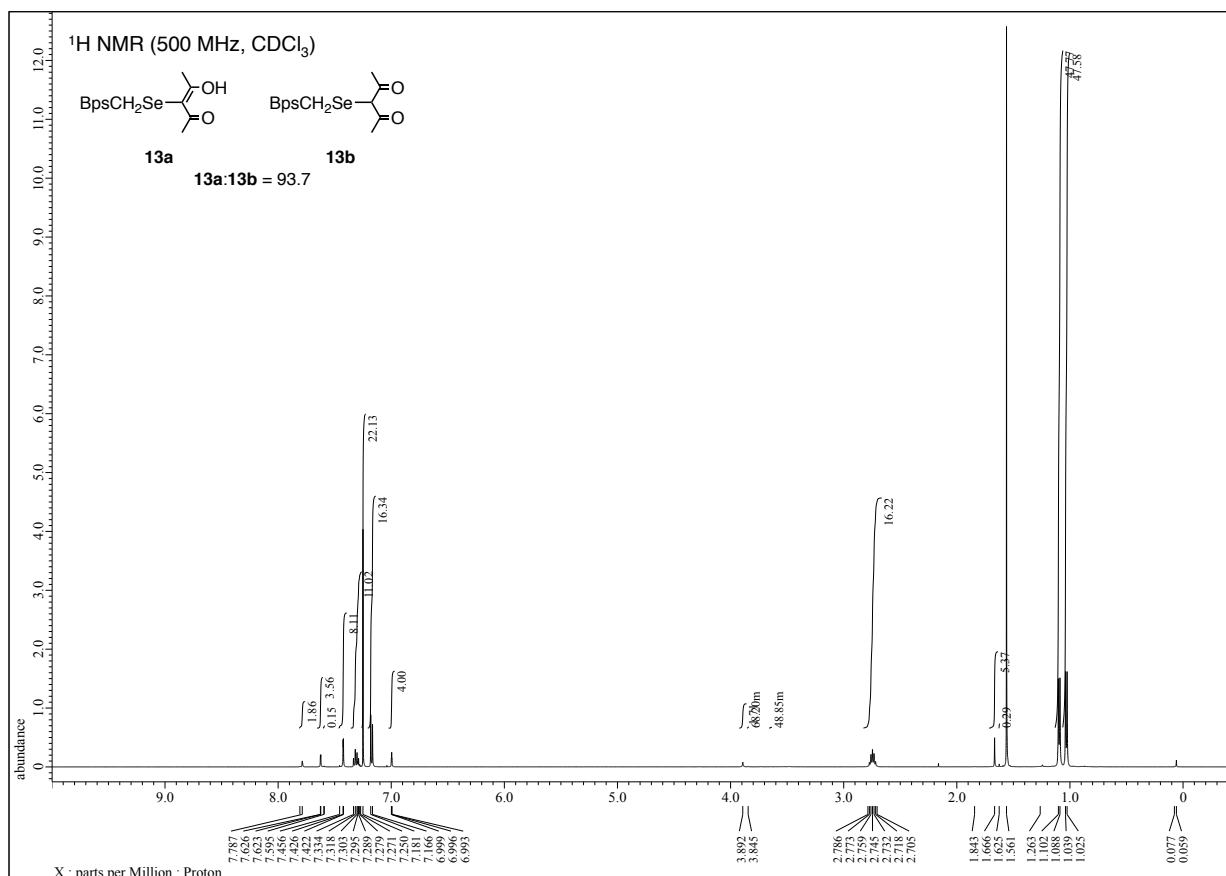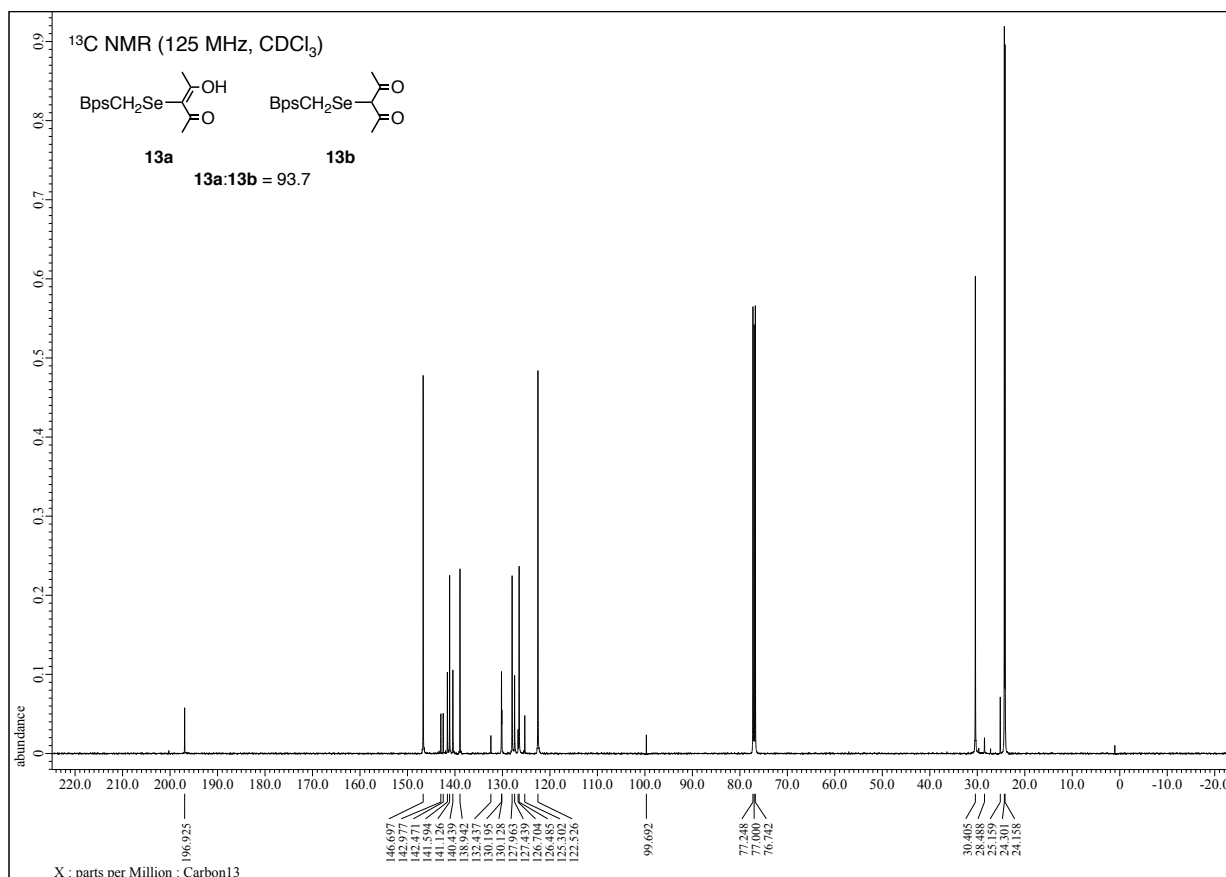

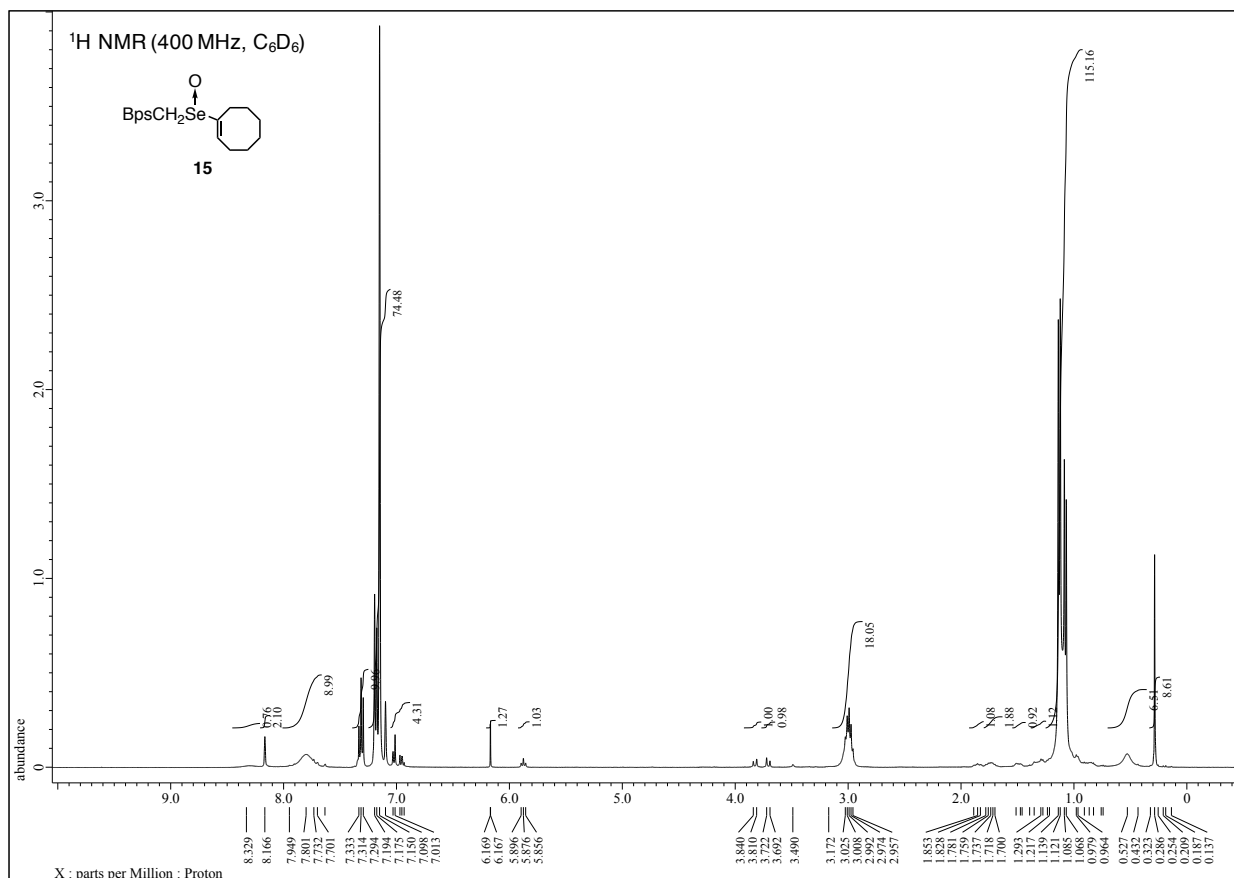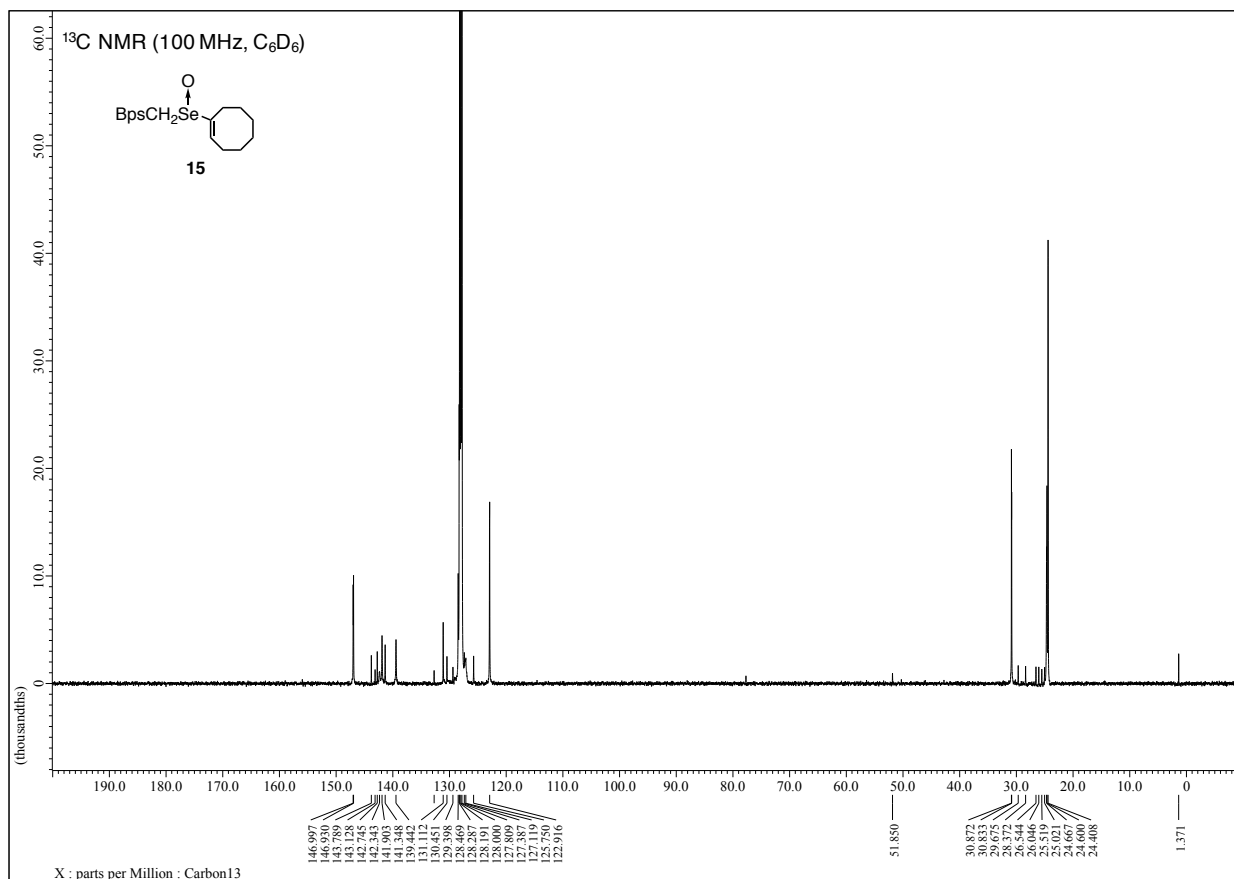

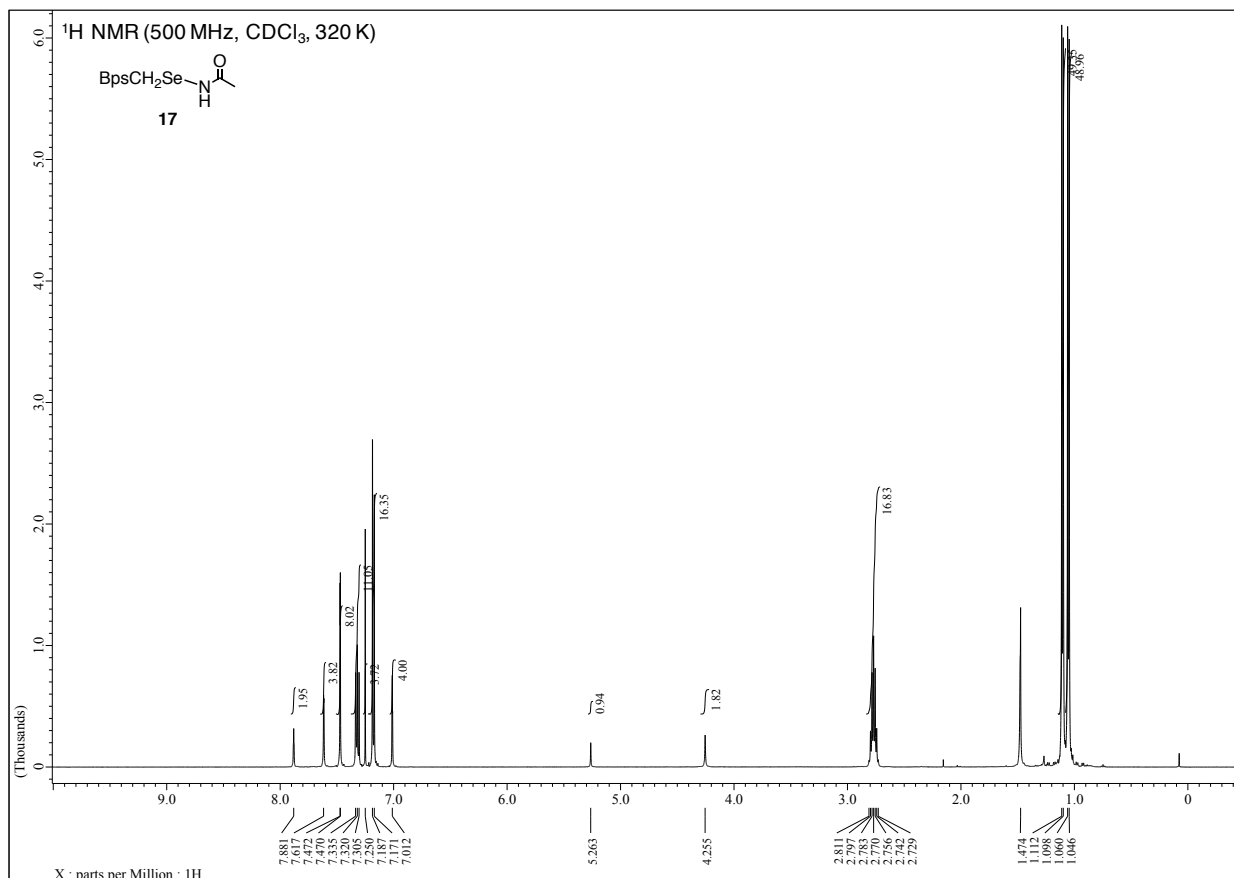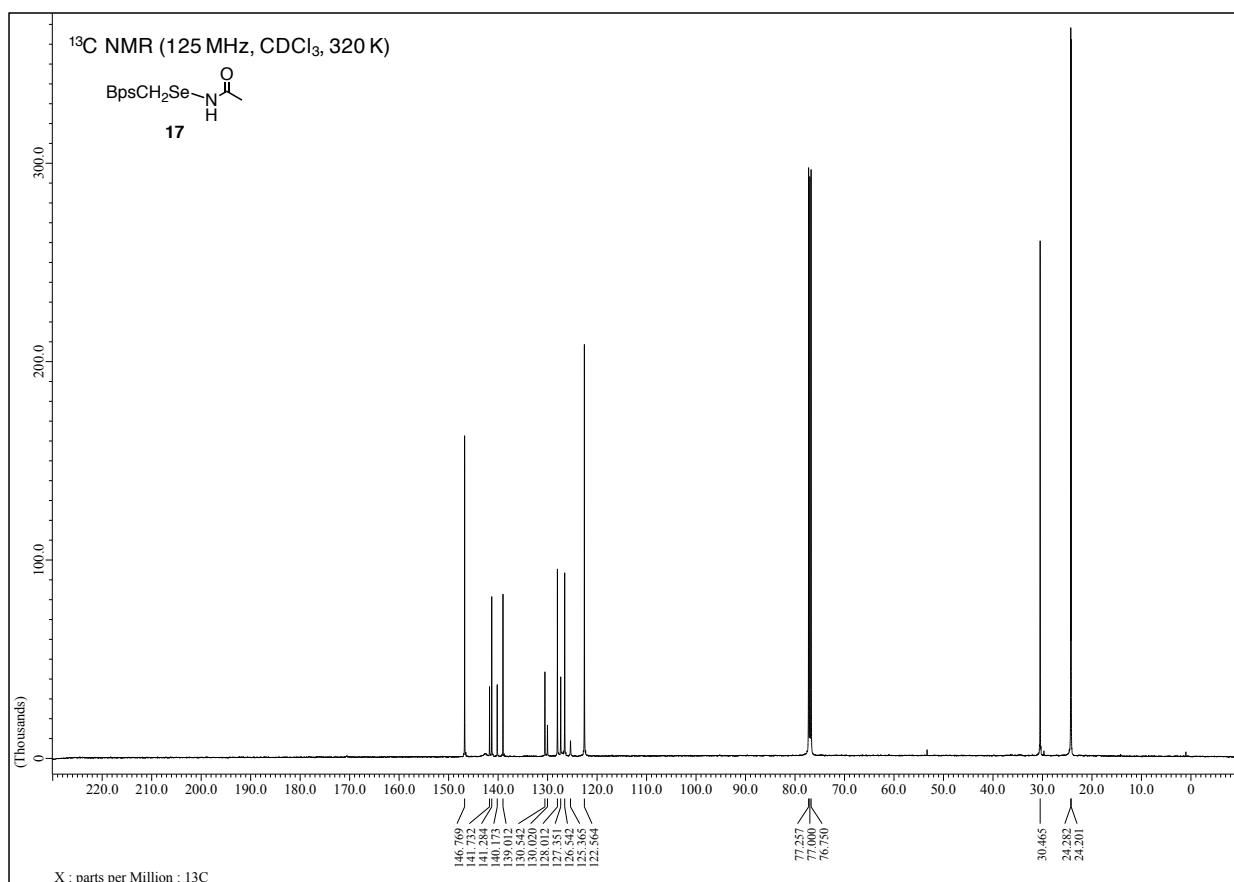



## References

---

- 1 Goto, K.; Yamamoto, G.; Tan, B.; Okazaki, R. *Tetrahedron Lett.* **2001**, 42, 4875-4877.
- 2 Kehlbeck, J. D.; Dimise, E. J.; Sparks, S. M.; Ferrara, S.; Tanski, J. M.; Anderson, C. M. *Synthesis* **2007**, 1979-1983.
- 3 Lulinski, S.; Serwatowski, J. *J. Org. Chem.* **2003**, 68, 5384-5387.
- 4 Garcia-Hartjes, J.; Dommerholt, J.; Wennekes, T.; van Delft, F. L.; Zuilhof, H. *Eur. J. Org. Chem.* **2013**, 3712-3720.
